# Supplementary material for: Unprecedented influence of remote substituents on reactivity and stereoselectivity in Cu(i)-catalysed [2 + 2] photocycloaddition. An approach towards the synthesis of tricycloclavulone
Source: Royal Society of Chemistry journal article supplement (doi:10.1039/c1ob05233k), 2011-01-01

*Supplementary Information for*

**Unprecedented influence of remote substituents on reactivity and stereoselectivity in Cu(I)-catalyzed [2+2] photocycloaddition reaction.  
An approach towards the synthesis of tricyclocavulone.**

Sujit Mondal, Ram Naresh Yadav and Subrata Ghosh\*

*Department of Organic Chemistry, Indian Association for the Cultivation of Science, Jadavpur,  
Kolkata 700 032, India*

[ocsg@iacs.res.in](mailto:ocsg@iacs.res.in)

**(<sup>1</sup>H & <sup>13</sup>C NMR Spectra for all new compounds **3-41** and 2D NMR  
& NOE Spectra for **27** along with DEPT spectrum for **41**)**

# <sup>1</sup>H NMR of **3** in CDCl<sub>3</sub> (300 MHz)

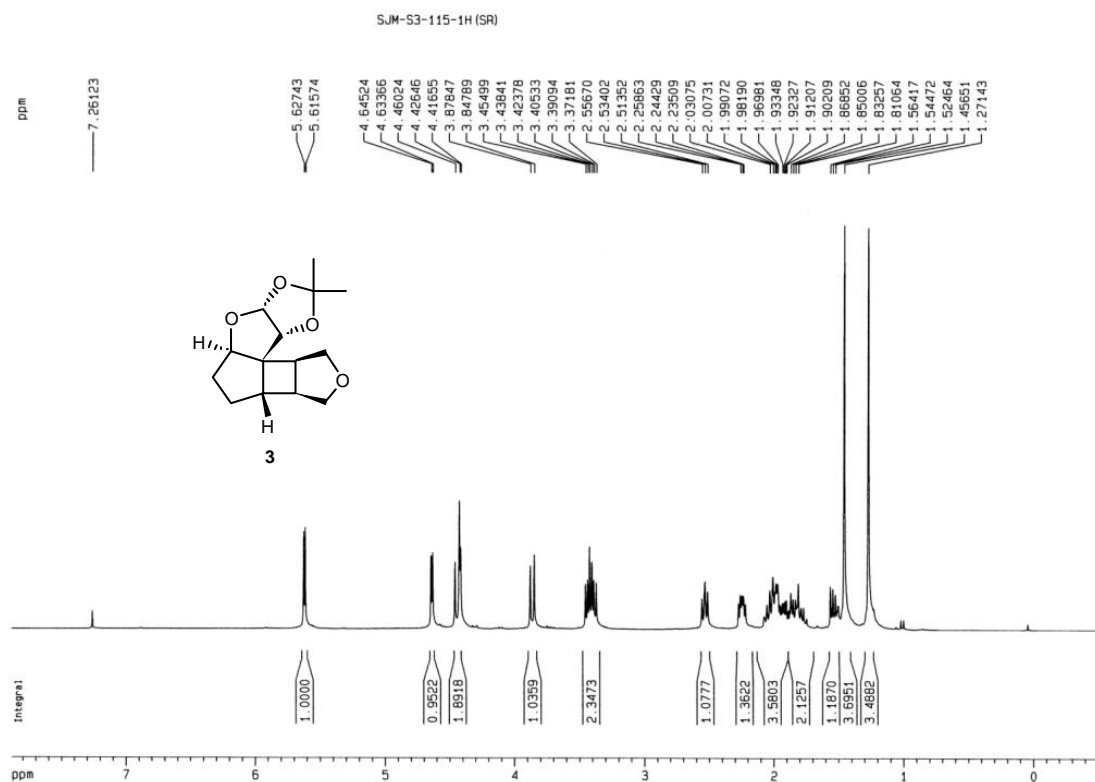

# <sup>13</sup>C NMR of **3** in CDCl<sub>3</sub> (75 MHz)

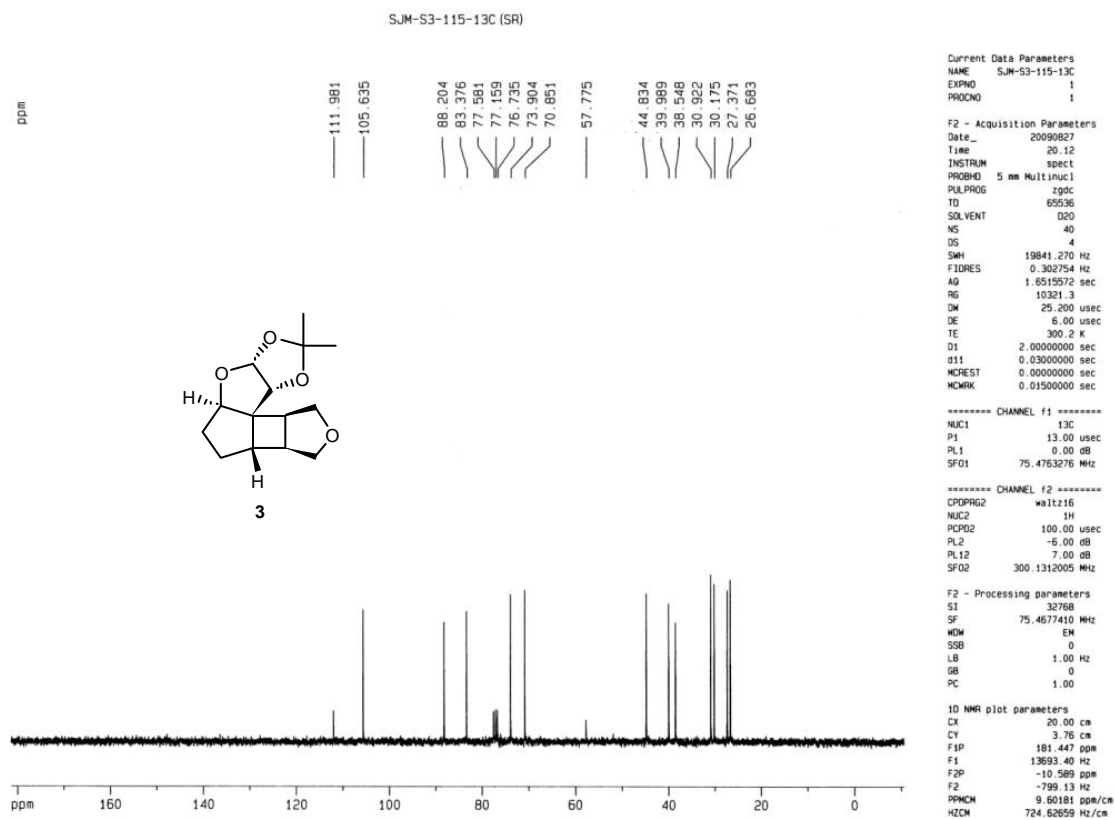

$^1\text{H}$  NMR of **5** in  $\text{CDCl}_3$  (300 MHz)

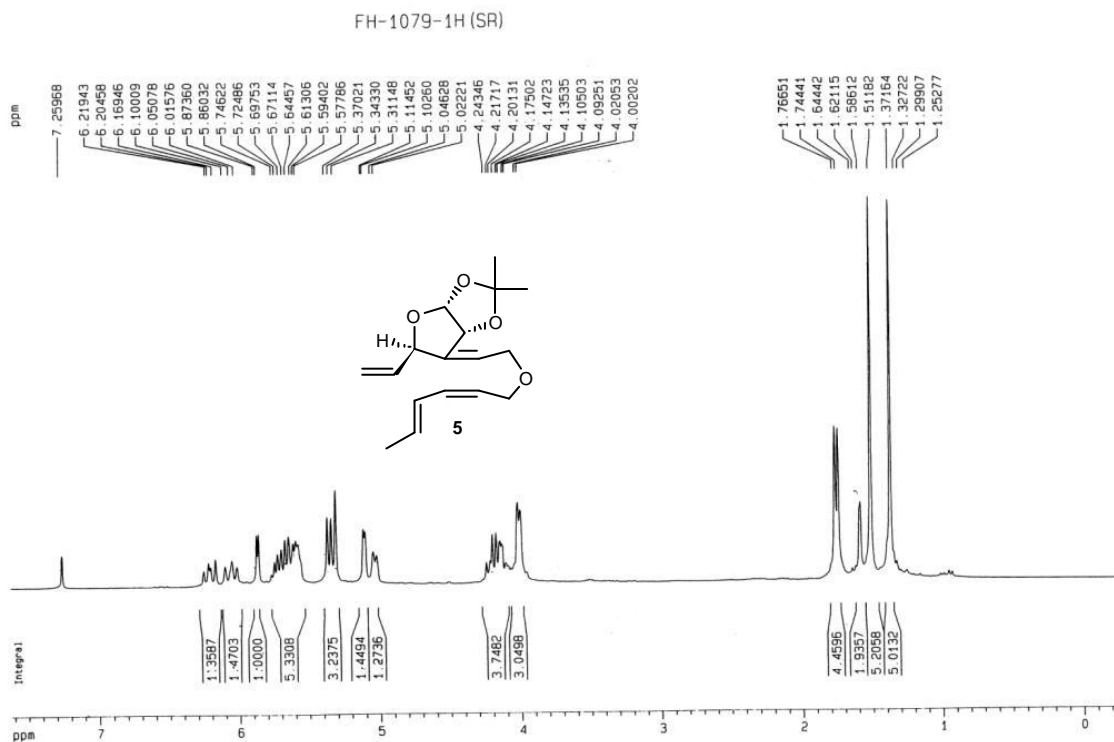

$^{13}\text{C}$  NMR of **5** in  $\text{CDCl}_3$  (75 MHz)

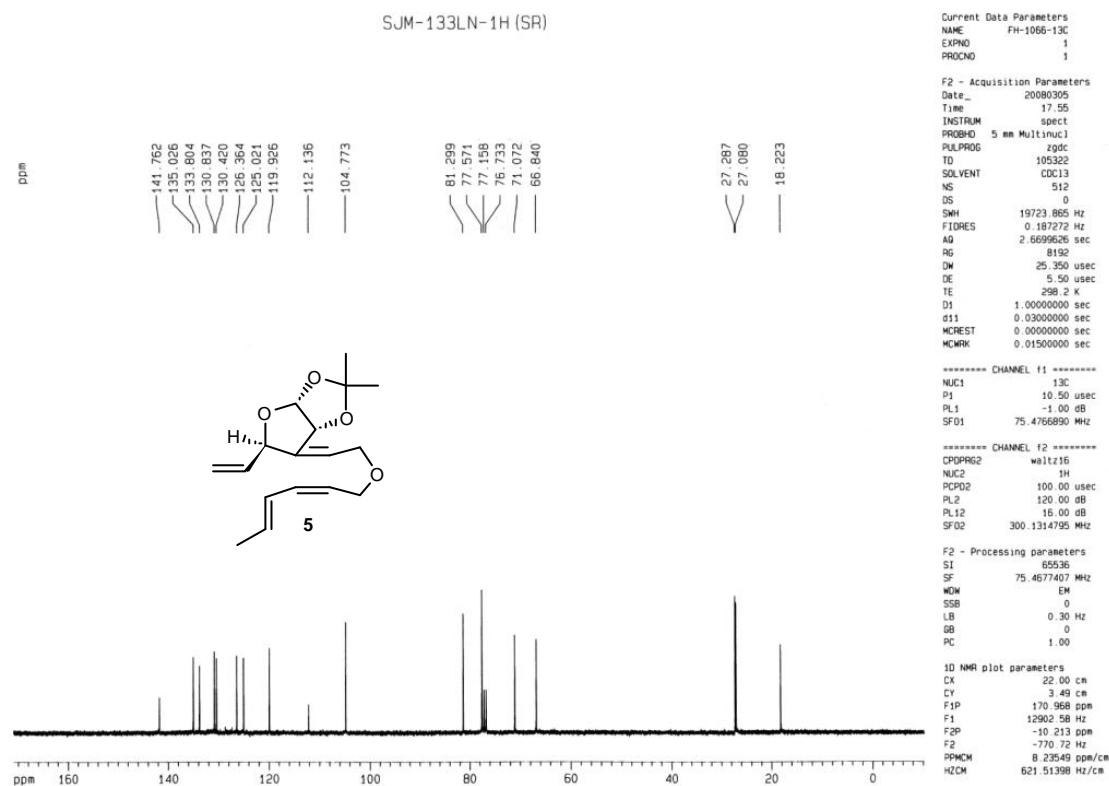

# <sup>1</sup>H NMR of **8** in CDCl<sub>3</sub> (300 MHz)

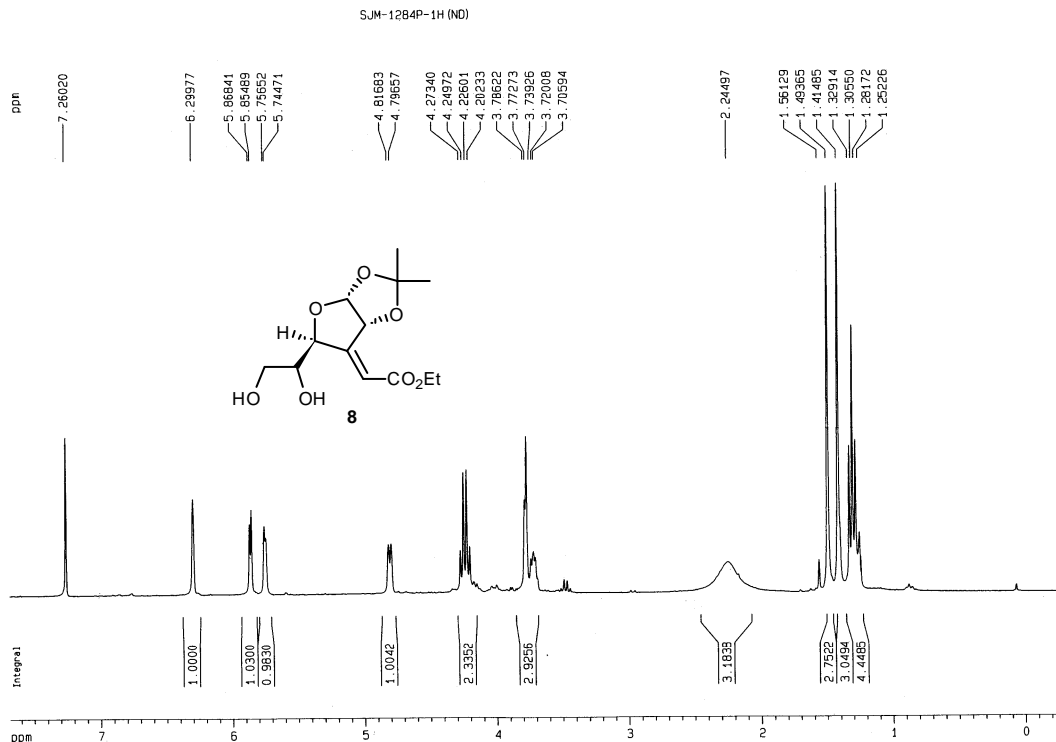

# <sup>13</sup>C NMR of **8** in CDCl<sub>3</sub> (75 MHz)

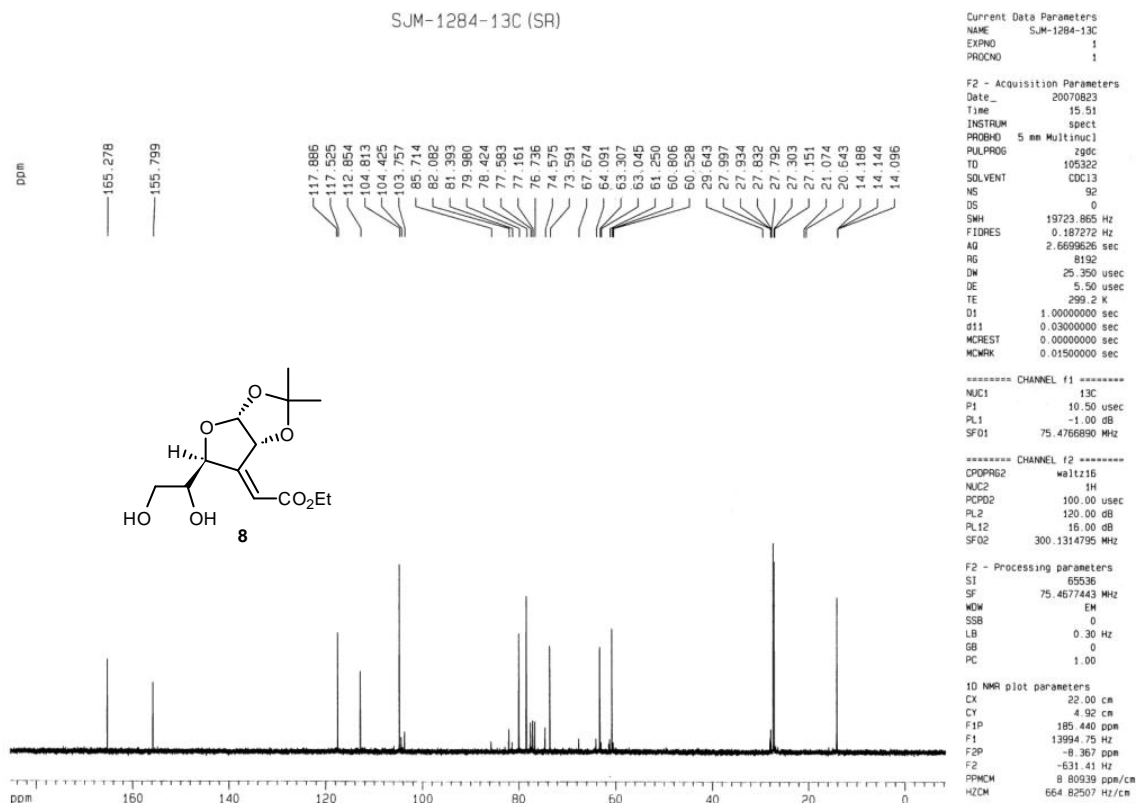

$^1\text{H}$  NMR of **9** in  $\text{CDCl}_3$  (300 MHz)

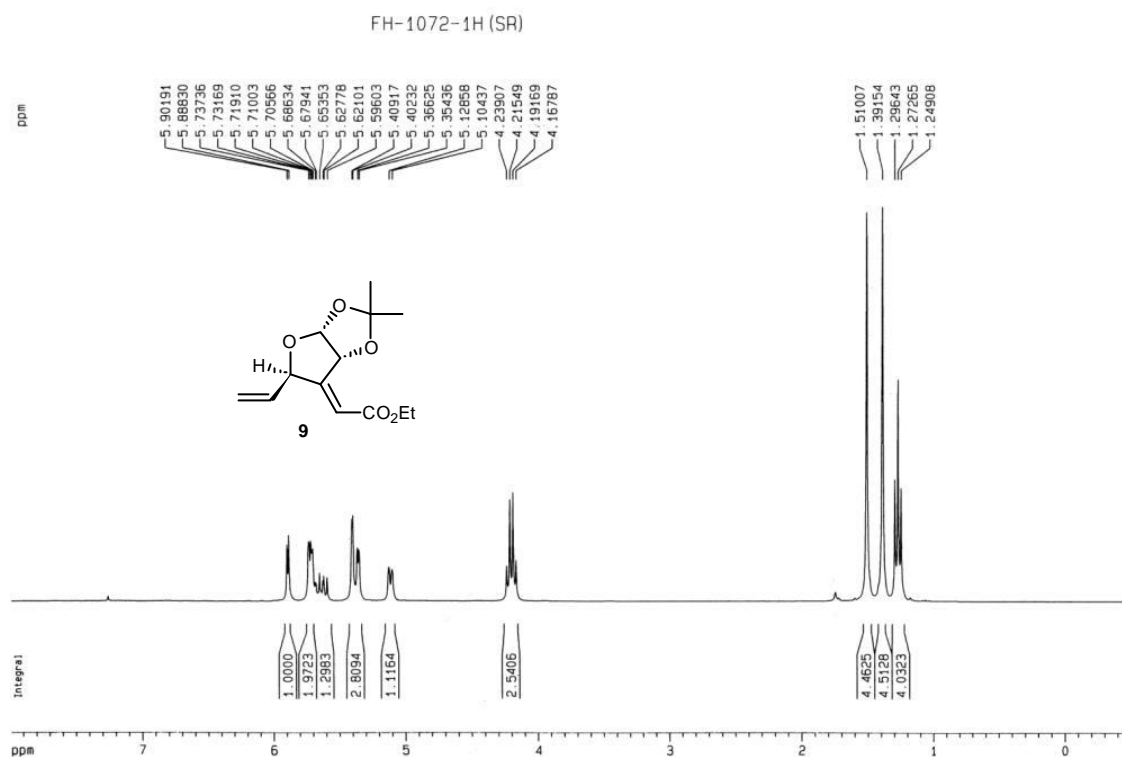

$^{13}\text{C}$  NMR of **9** in  $\text{CDCl}_3$  (75 MHz)

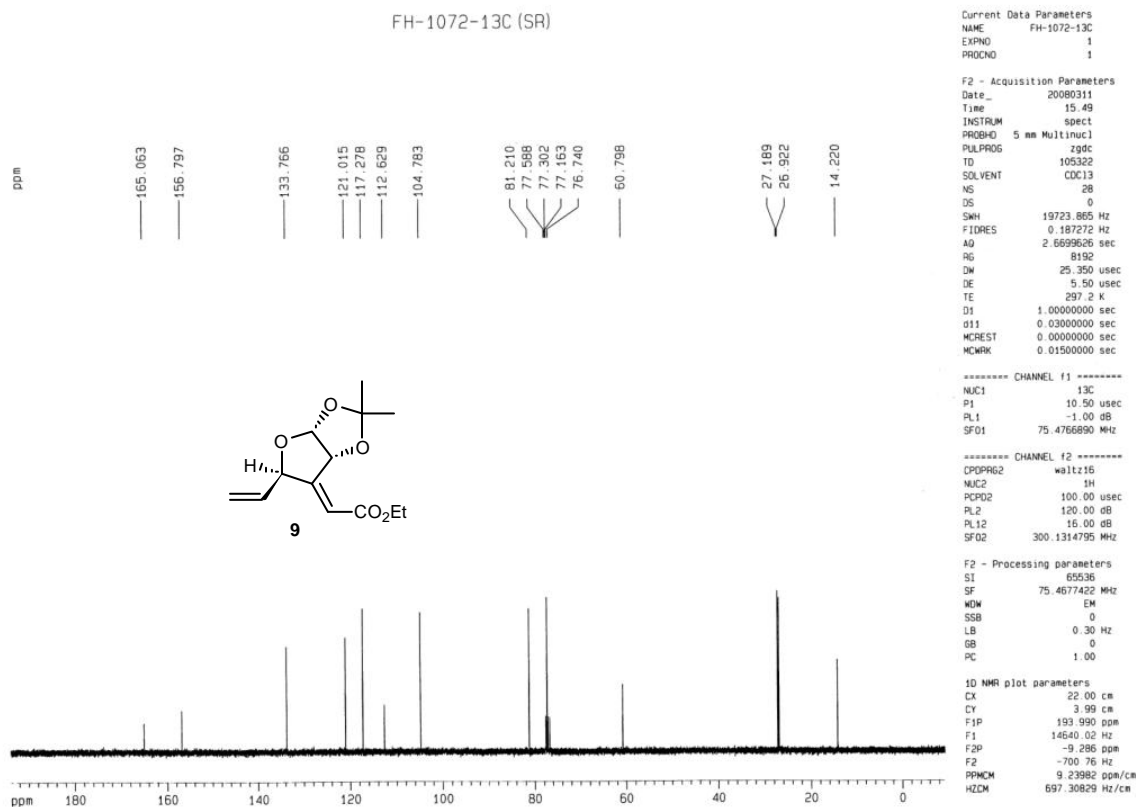

# <sup>1</sup>H NMR of **10** in CDCl<sub>3</sub> (300 MHz)

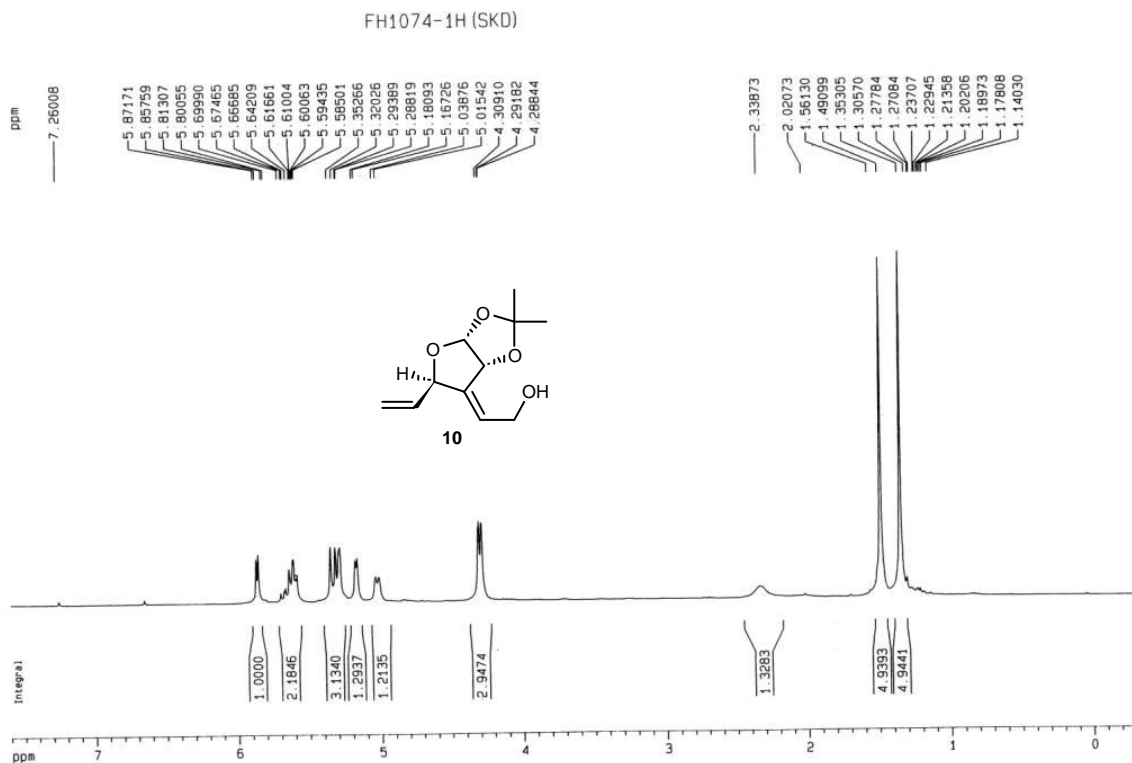

# <sup>13</sup>C NMR of **10** in CDCl<sub>3</sub> (75 MHz)

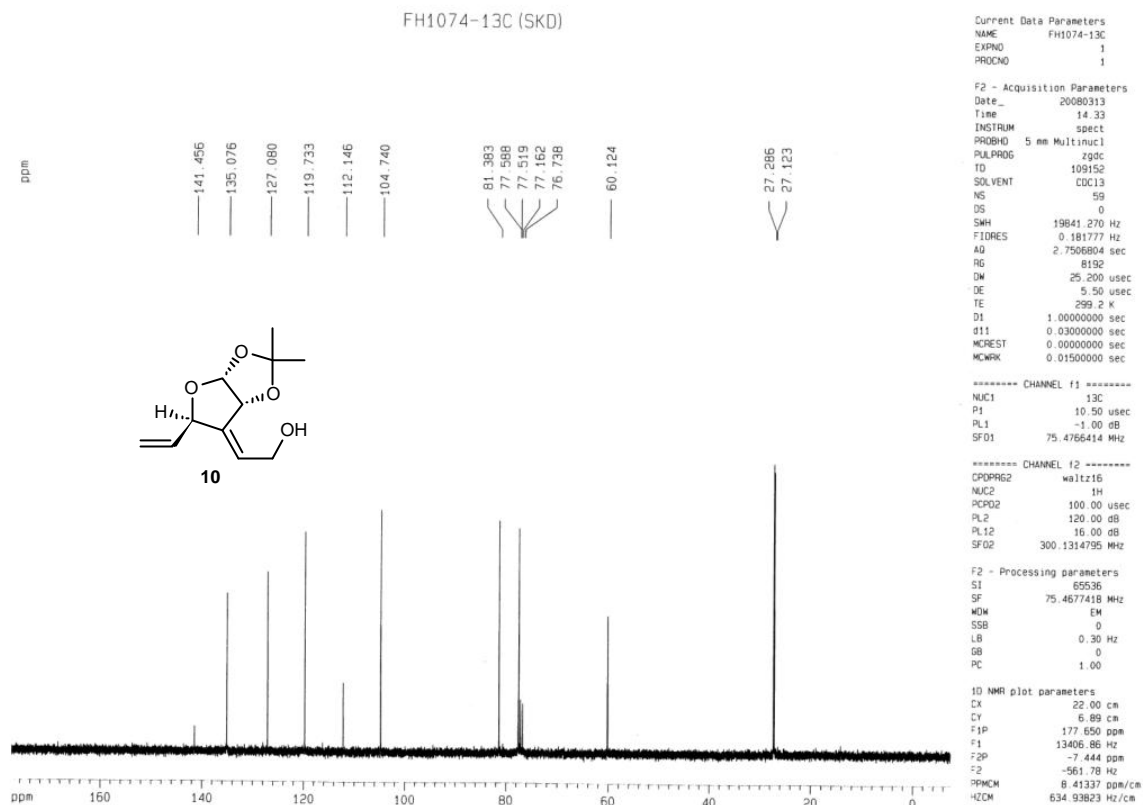

# <sup>1</sup>H NMR of **11** in CDCl<sub>3</sub> (300 MHz)

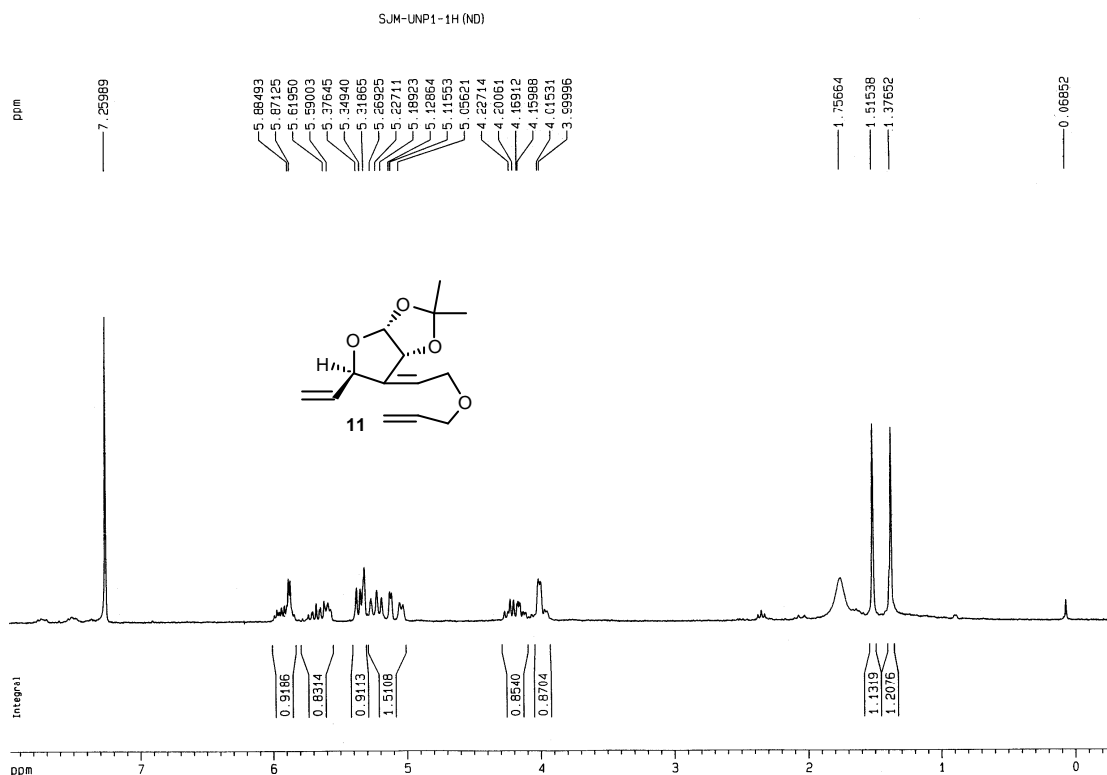

# <sup>13</sup>C NMR of **11** in CDCl<sub>3</sub> (125 MHz)

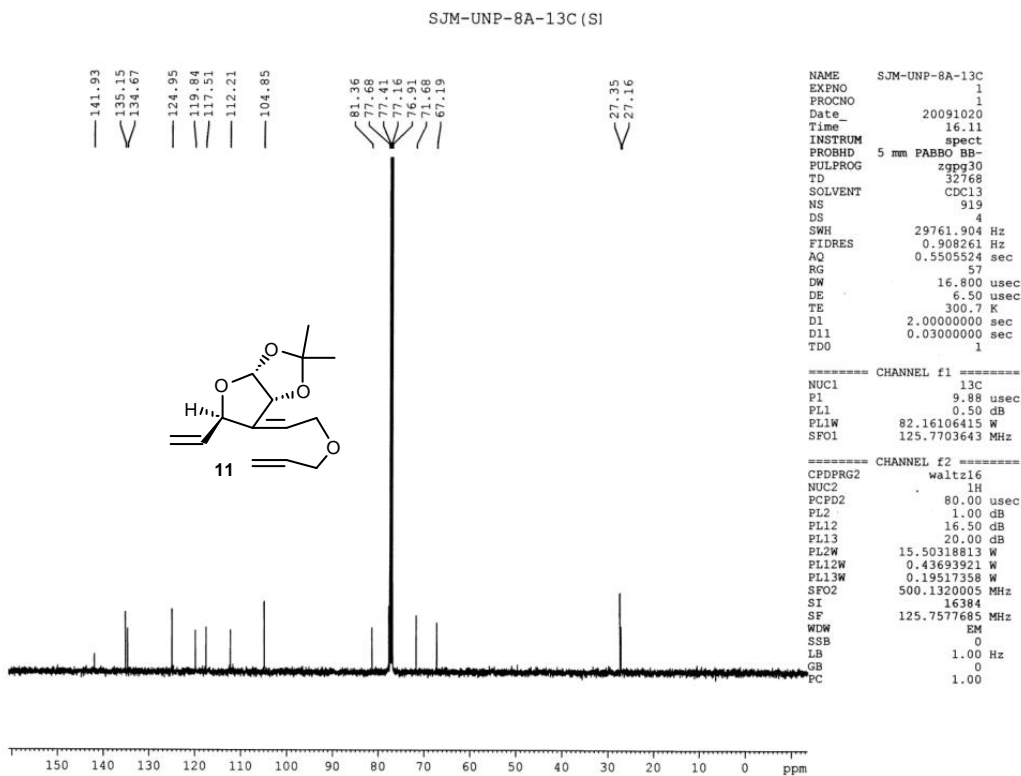

# <sup>1</sup>H NMR of **16a** in CDCl<sub>3</sub> (300 MHz)

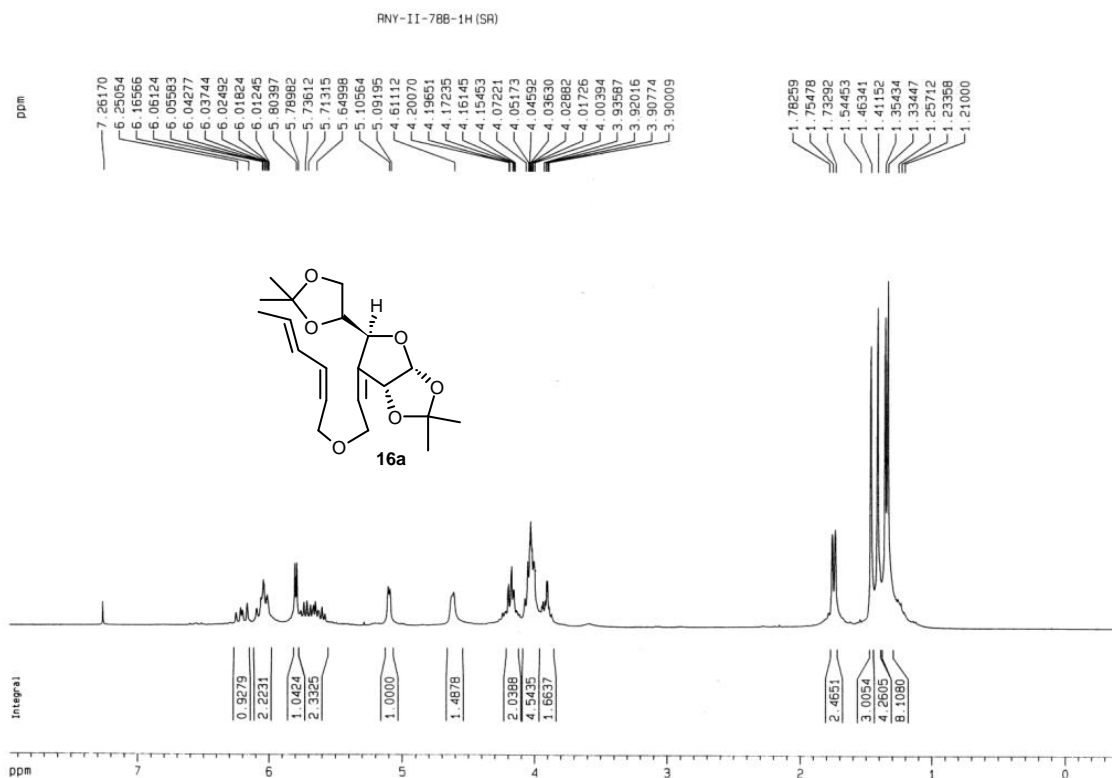

# <sup>13</sup>C NMR of **16a** in CDCl<sub>3</sub> (75 MHz)

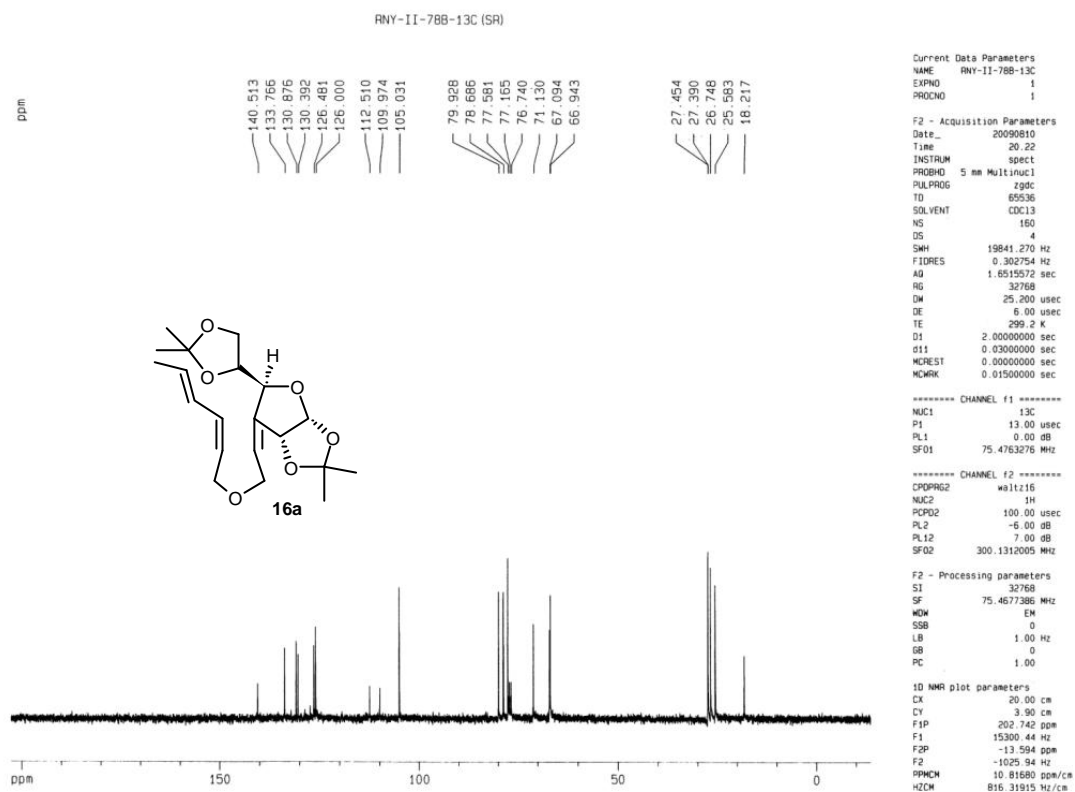



$^1\text{H}$  NMR of **16b** in  $\text{CDCl}_3$  (500 MHz)

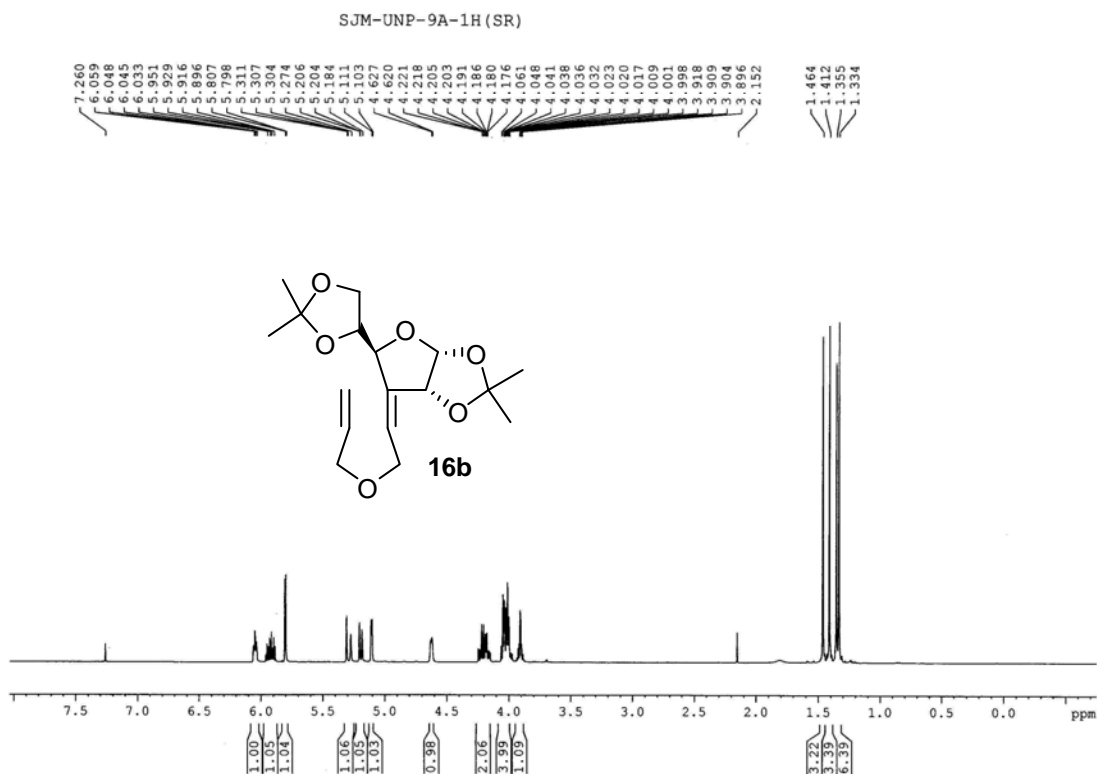

$^{13}\text{C}$  NMR of **16b** in  $\text{CDCl}_3$  (125 MHz)

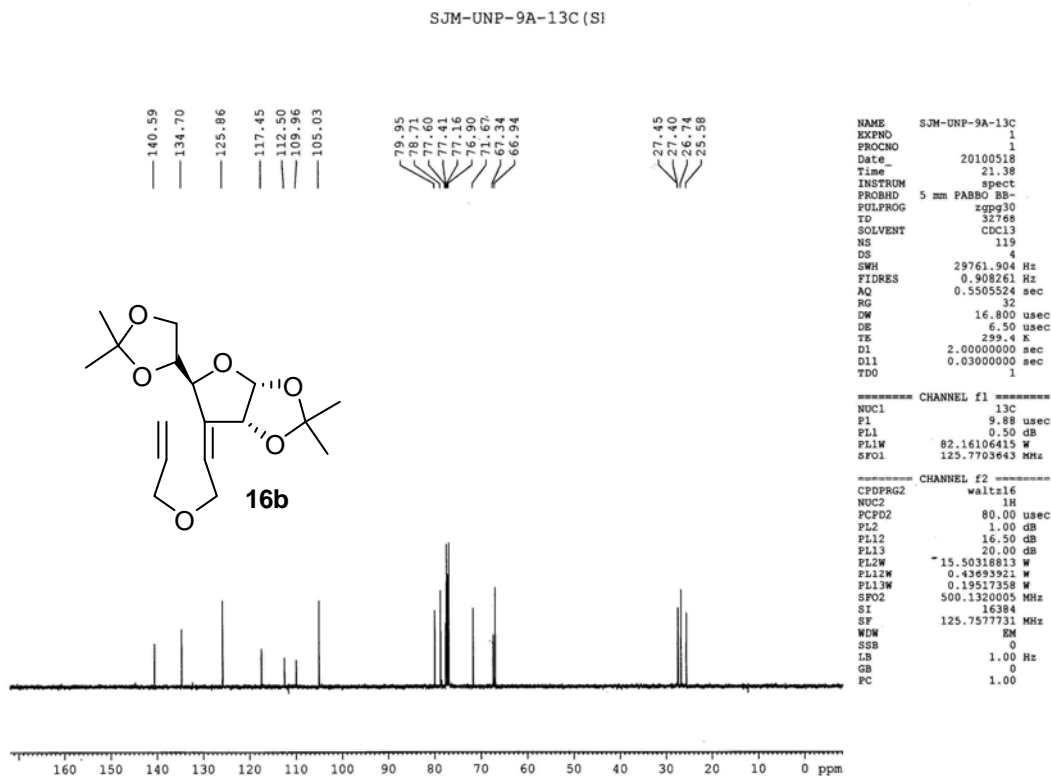

<sup>1</sup>H NMR of **16c** in CDCl<sub>3</sub> (300 MHz)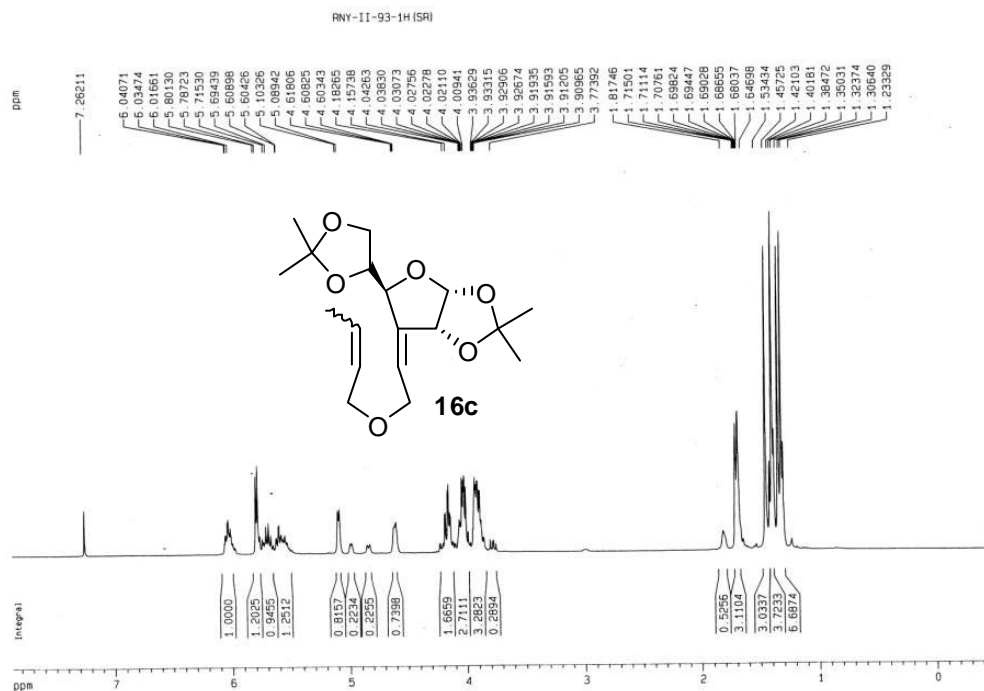 $^{13}\text{C}$  NMR of **16c** in  $\text{CDCl}_3$  (75 MHz)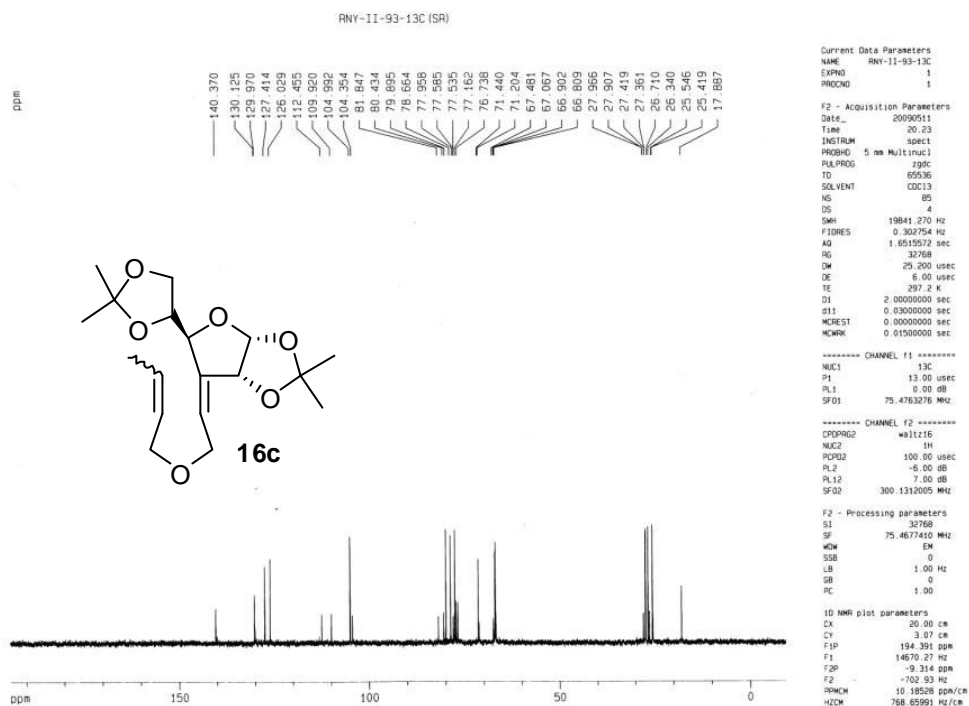

<sup>1</sup>H NMR of **17a** in CDCl<sub>3</sub> (300 MHz)

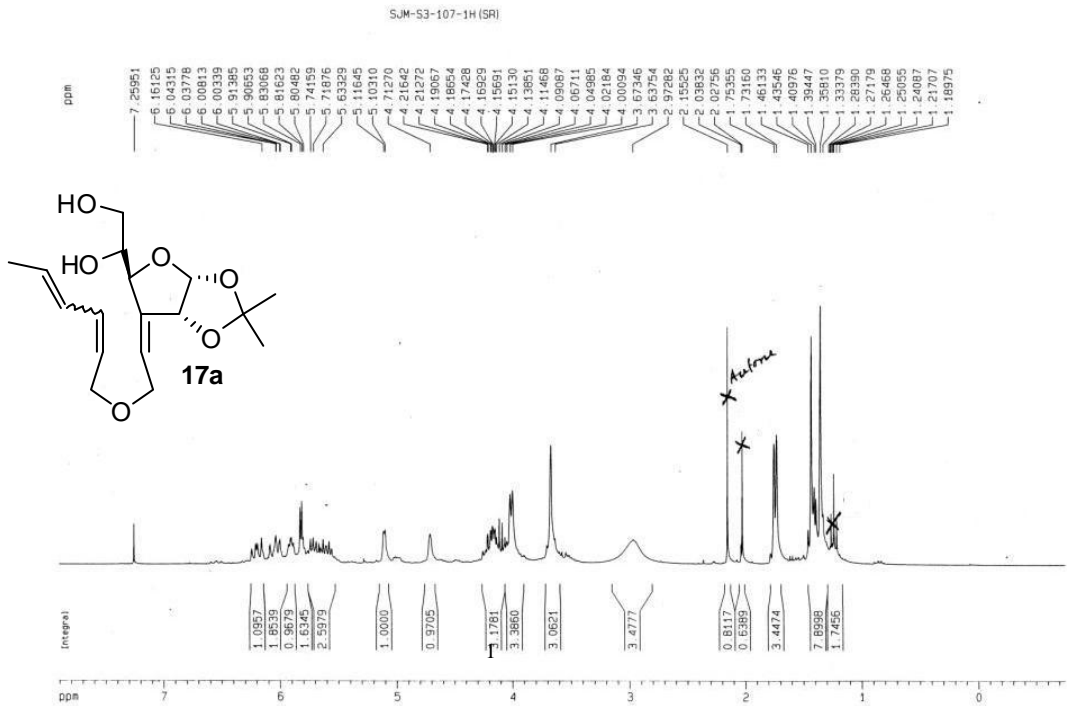

<sup>13</sup>C NMR of **17a** in CDCl<sub>3</sub> (75 MHz)

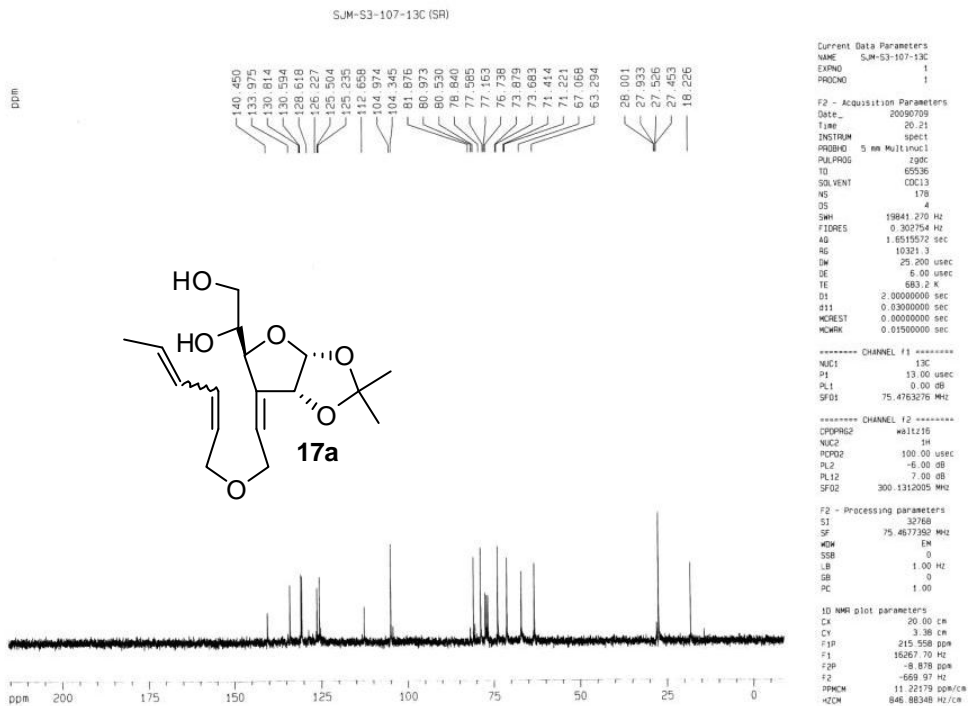

$^1\text{H}$  NMR of **17b** in  $\text{CDCl}_3$  (300 MHz)

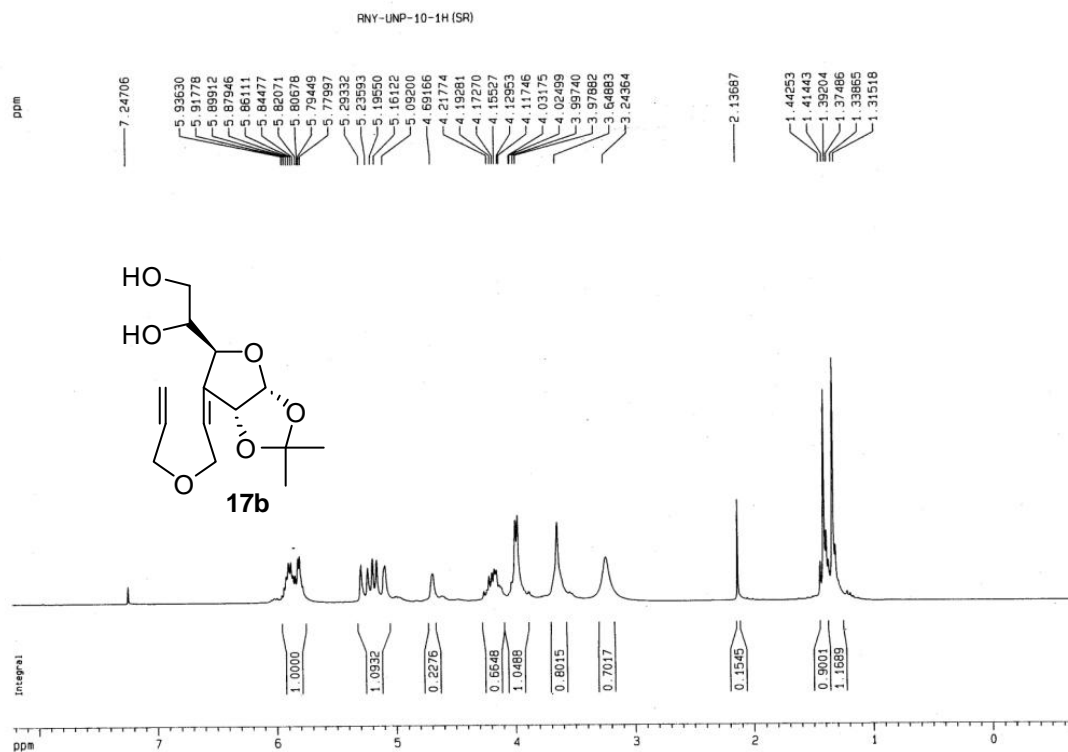

$^{13}\text{C}$  NMR of **17b** in  $\text{CDCl}_3$  (75 MHz)

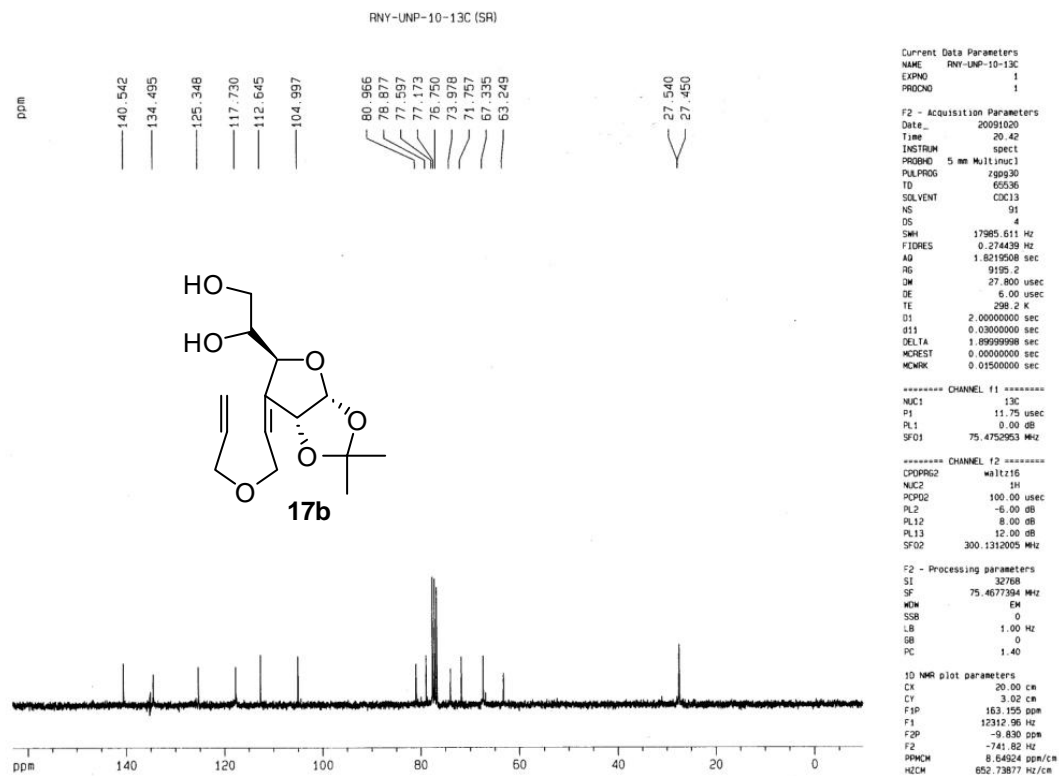

# <sup>1</sup>H NMR of **18a** in CDCl<sub>3</sub> (500 MHz)

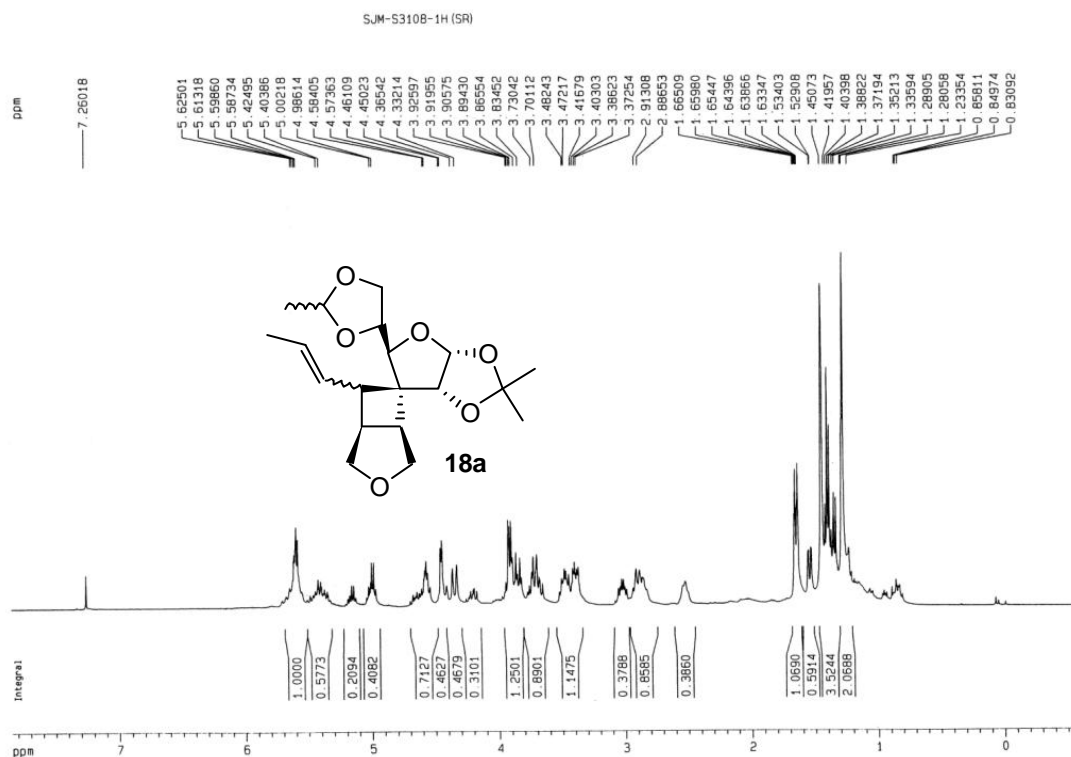

# <sup>13</sup>C NMR of **18a** in CDCl<sub>3</sub> (75 MHz)

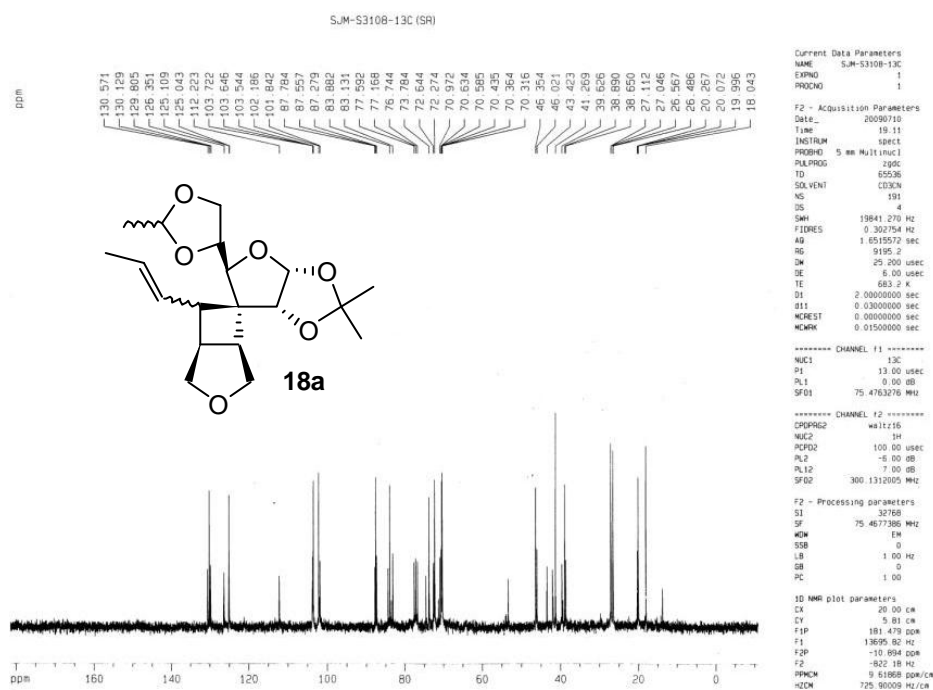

# <sup>1</sup>H NMR of **18b** in CDCl<sub>3</sub> (300 MHz)

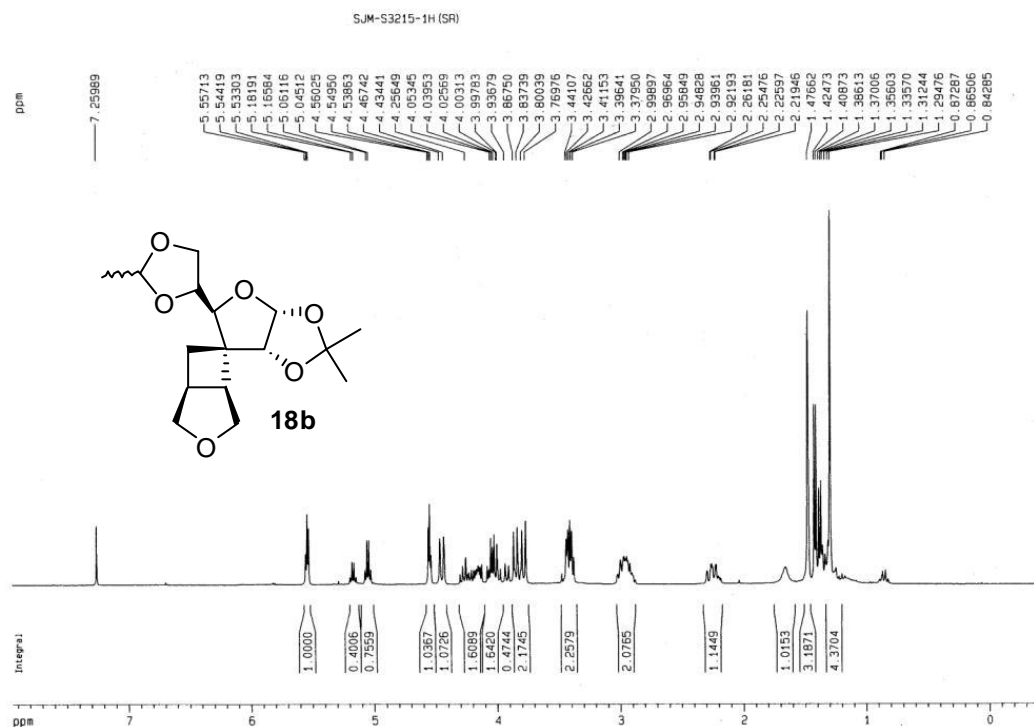

# <sup>13</sup>C NMR of **18b** in CDCl<sub>3</sub> (75 MHz)

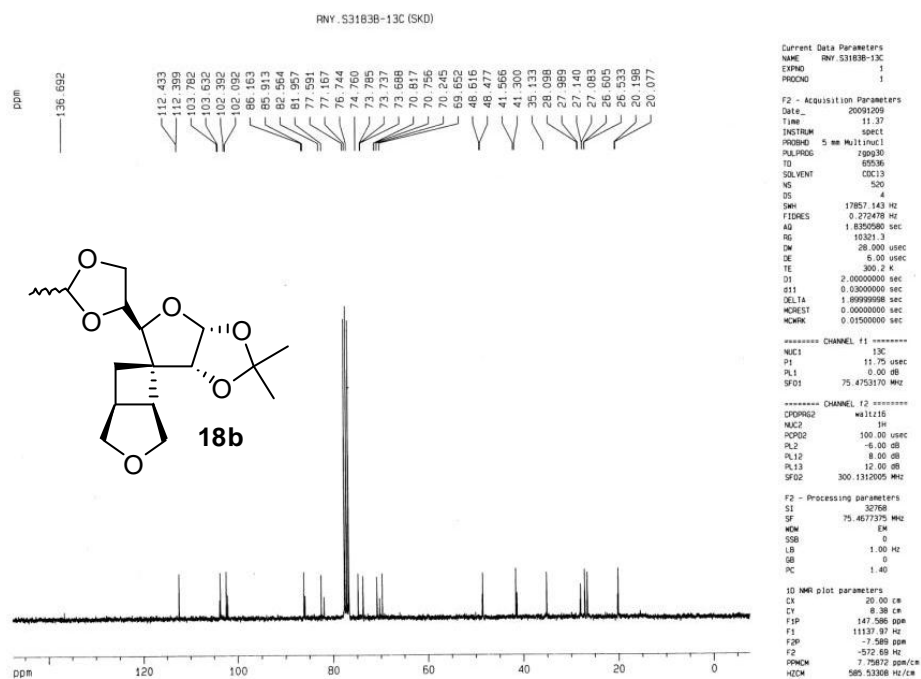

$^1\text{H}$  NMR of **18c** in  $\text{CDCl}_3$  (300 MHz)

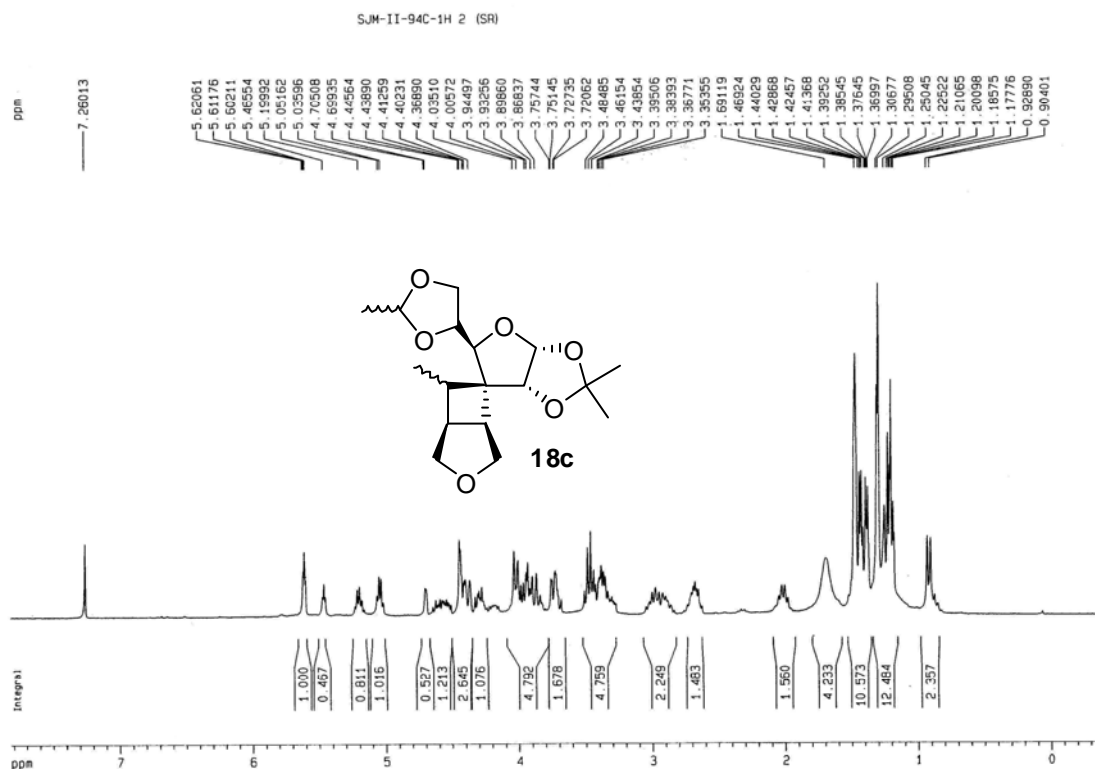

$^{13}\text{C}$  NMR of **18c** in  $\text{CDCl}_3$  (75 MHz)

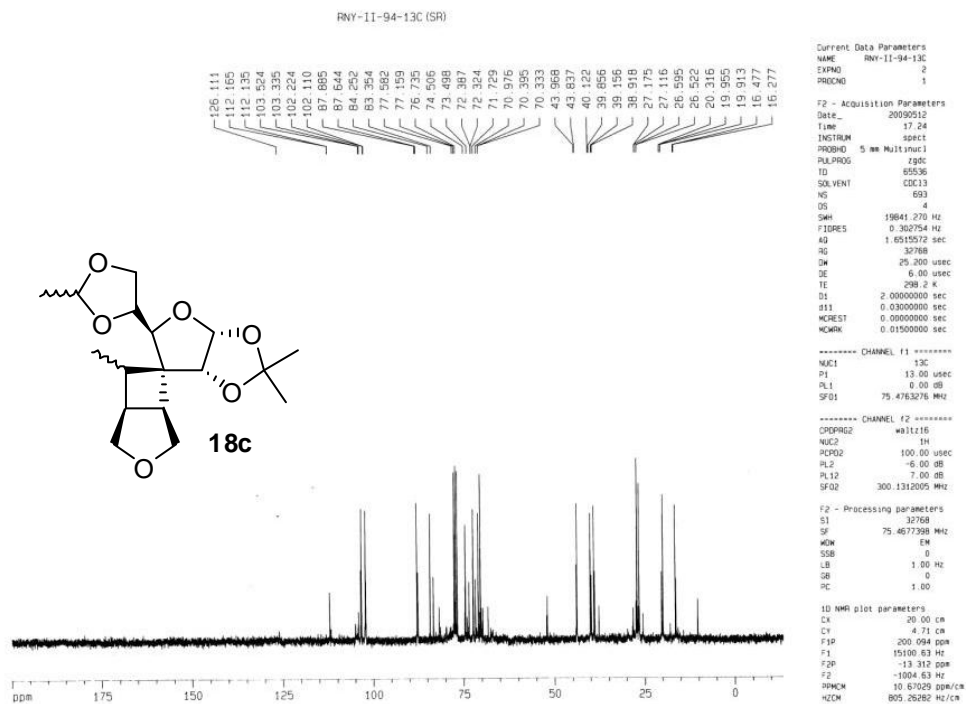



# <sup>1</sup>H NMR of **23** in CDCl<sub>3</sub> (300 MHz)

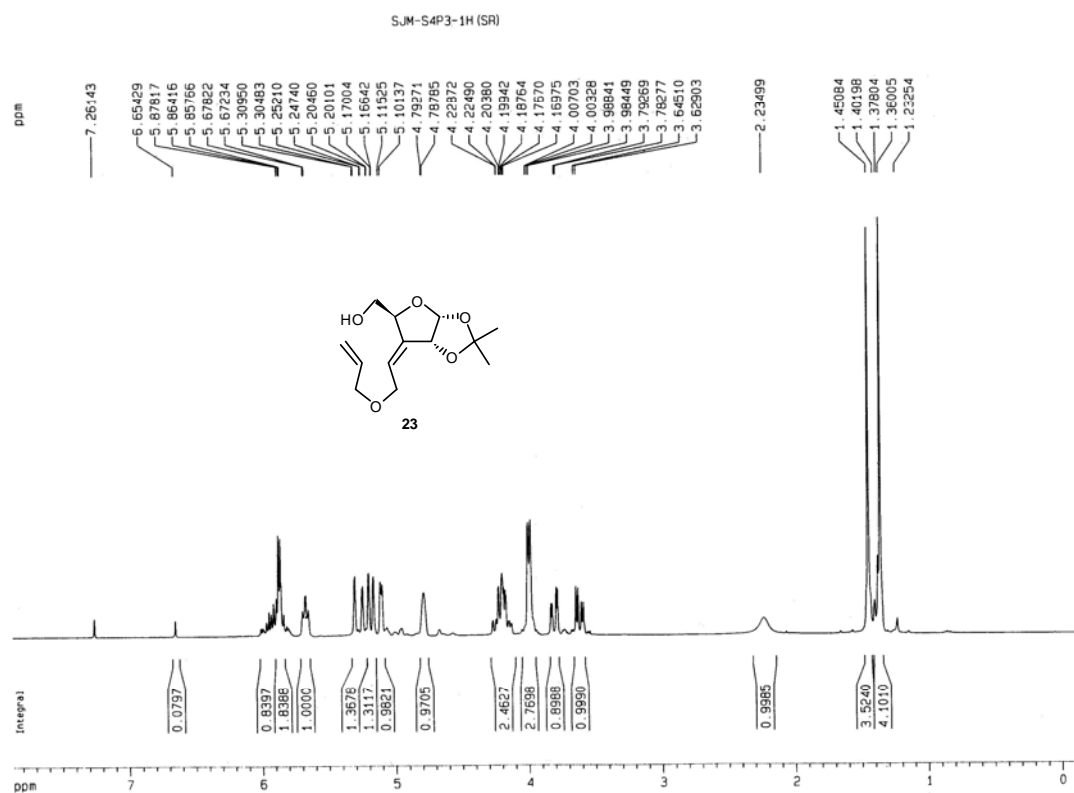

# <sup>13</sup>C NMR of **23** in CDCl<sub>3</sub> (75 MHz)

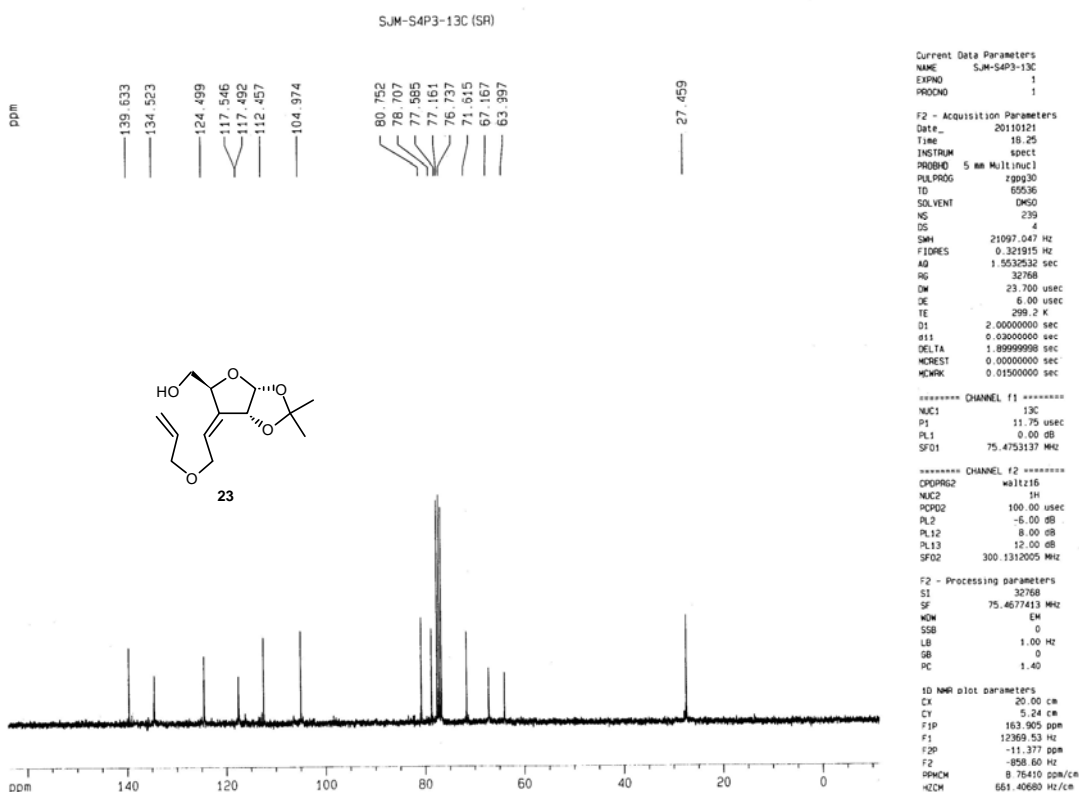



# <sup>1</sup>H NMR of **24** in CDCl<sub>3</sub> (300 MHz)

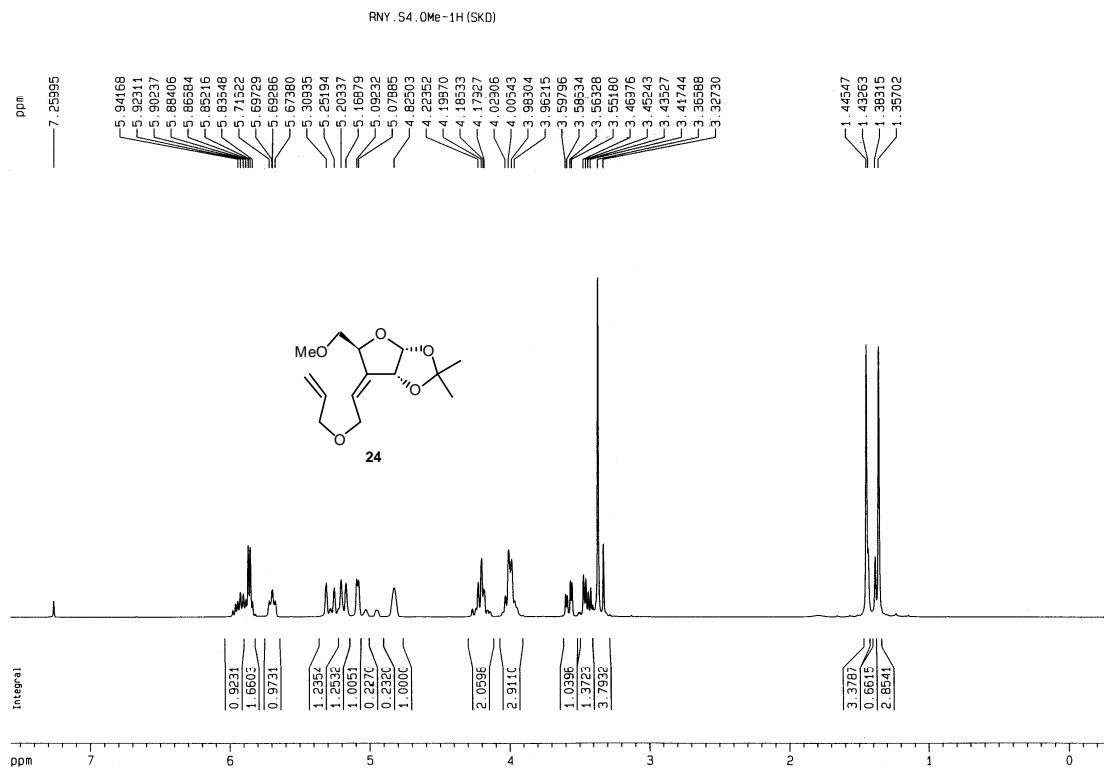

# <sup>13</sup>C NMR of **24** in CDCl<sub>3</sub> (75 MHz)

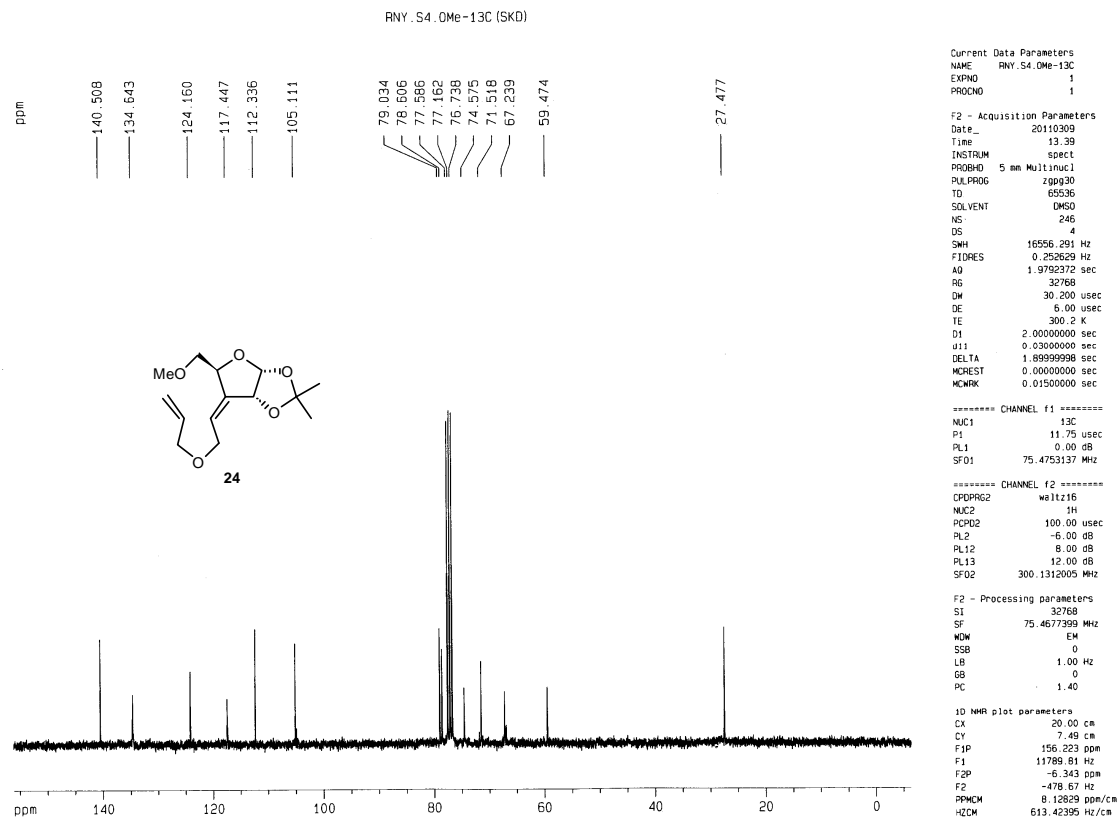

# <sup>1</sup>H NMR of **25** in CDCl<sub>3</sub> (300 MHz)

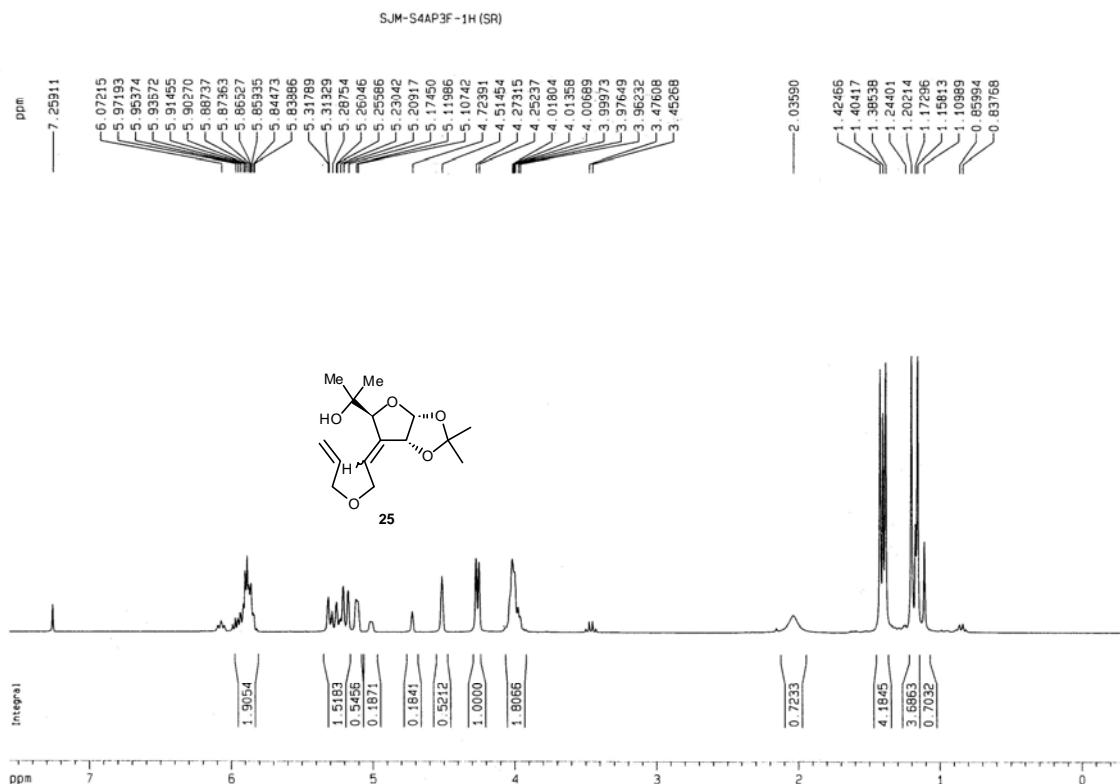

# <sup>13</sup>C NMR of **25** in CDCl<sub>3</sub> (75 MHz)

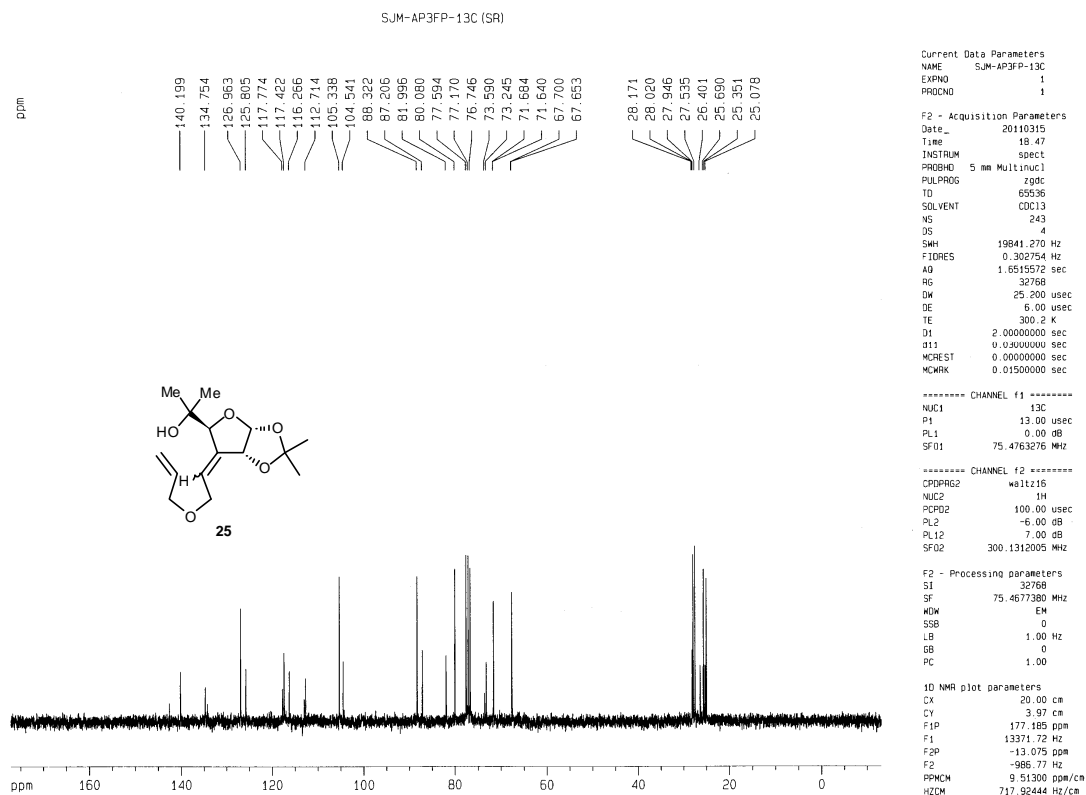

# <sup>1</sup>H NMR of **26** in CDCl<sub>3</sub> (300 MHz)

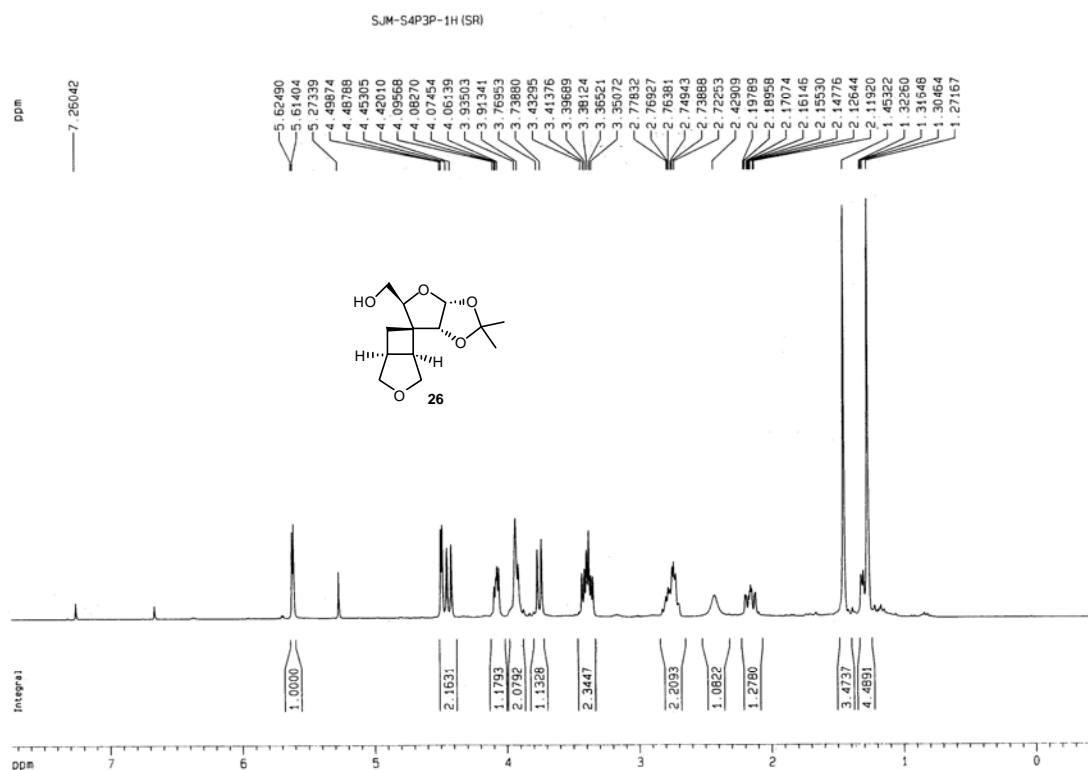

# <sup>13</sup>C NMR of **26** in CDCl<sub>3</sub> (75 MHz)

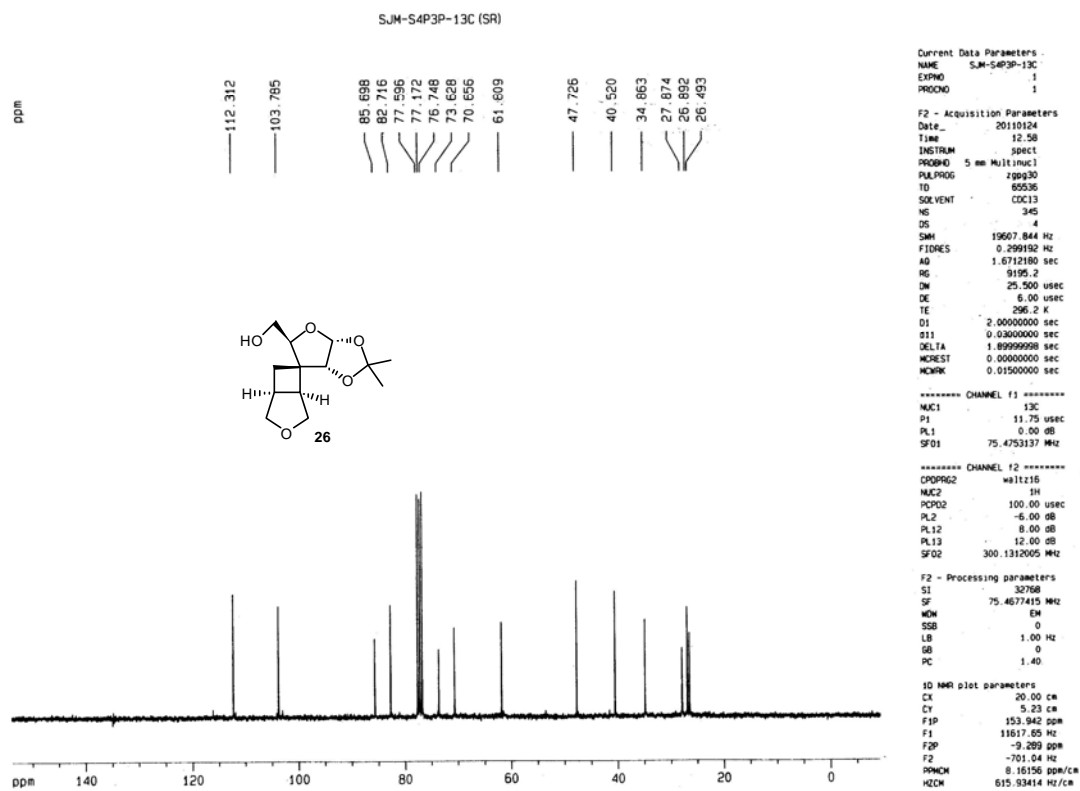

Supplement: c1ob05233k.pdf [file c1ob05233k.pdf]
