# Supplementary material for: Unprecedented influence of remote substituents on reactivity and stereoselectivity in Cu(i)-catalysed [2 + 2] photocycloaddition. An approach towards the synthesis of tricycloclavulone
Source: Royal Society of Chemistry journal article supplement (doi:10.1039/c1ob05233k), 2011-01-01

*Supplementary Information for*

**Unprecedented influence of remote substituents on reactivity and stereoselectivity in Cu(I)-catalyzed [2+2] photocycloaddition reaction. An approach towards the synthesis of tricyclocavulone.**

Sujit Mondal, Ram Naresh Yadav and Subrata Ghosh\*

*Department of Organic Chemistry, Indian Association for the Cultivation of Science, Jadavpur,  
Kolkata 700 032, India*

[ocsg@iacs.res.in](mailto:ocsg@iacs.res.in)

(<sup>1</sup>H & <sup>13</sup>C NMR Spectra for compounds **27-41** and 2D NMR & NOE Spectra for **27** along with DEPT spectrum for **41**)

# <sup>1</sup>H NMR of **27** in CDCl<sub>3</sub> (500 MHz)

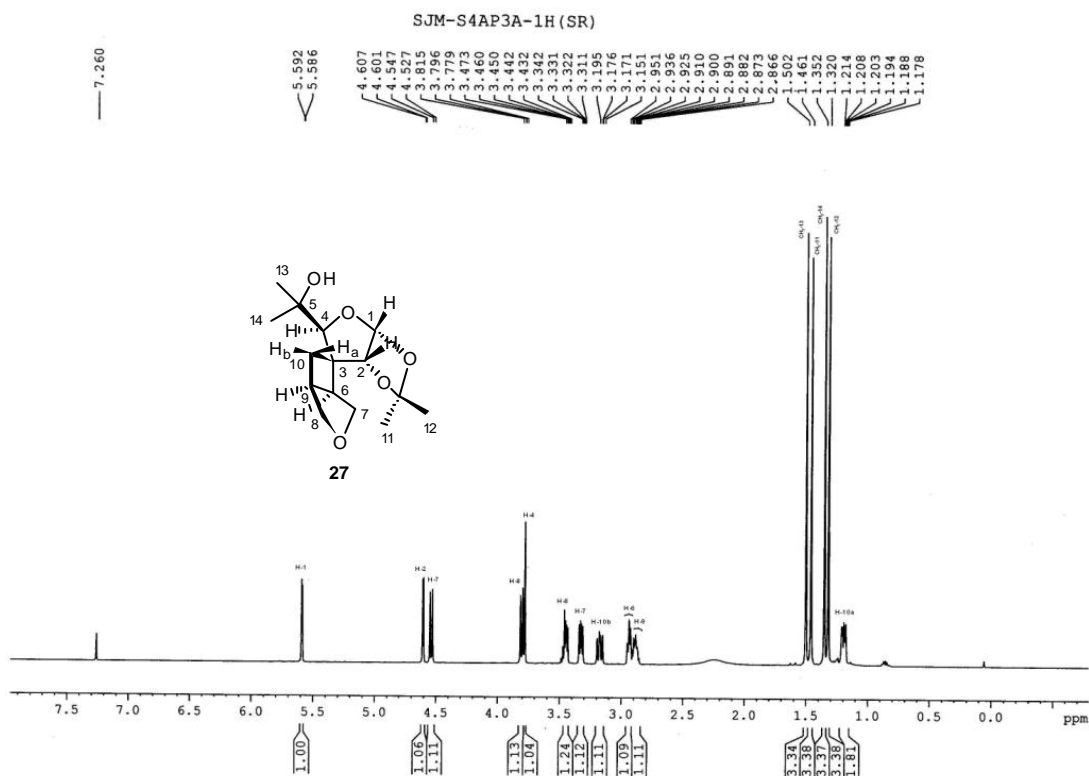

# <sup>13</sup>C NMR of **27** in CDCl<sub>3</sub> (125 MHz)

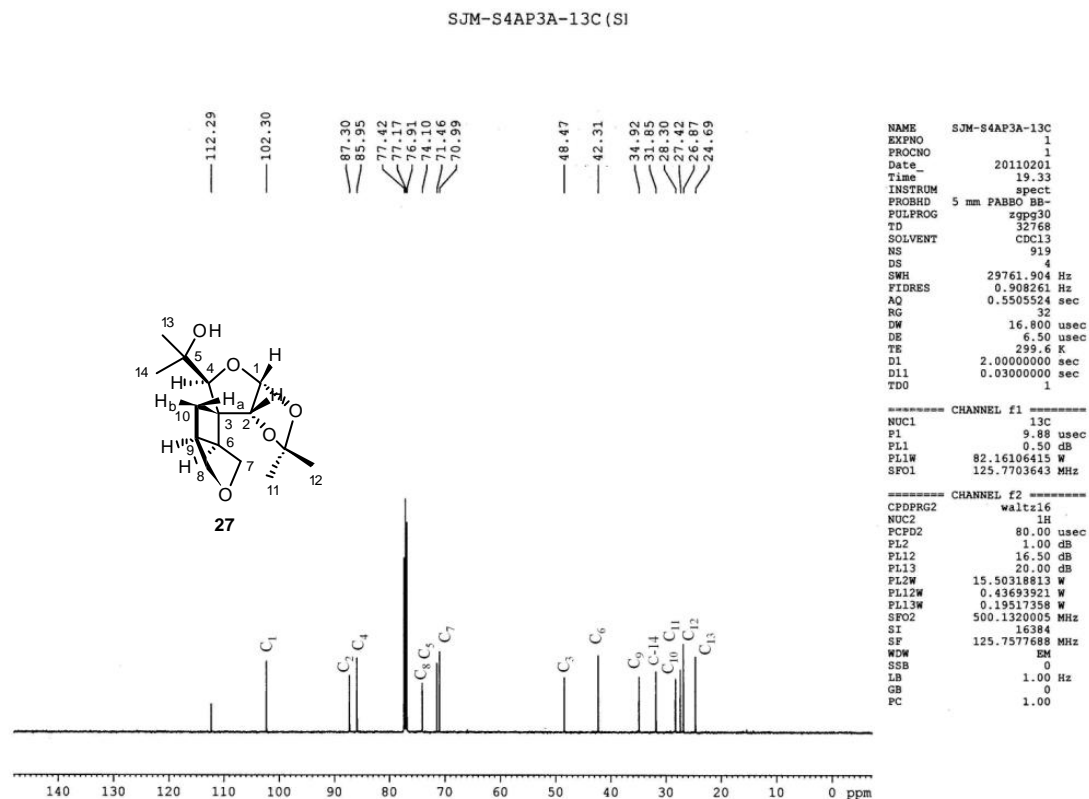

HSQC of **27** in CDCl<sub>3</sub>

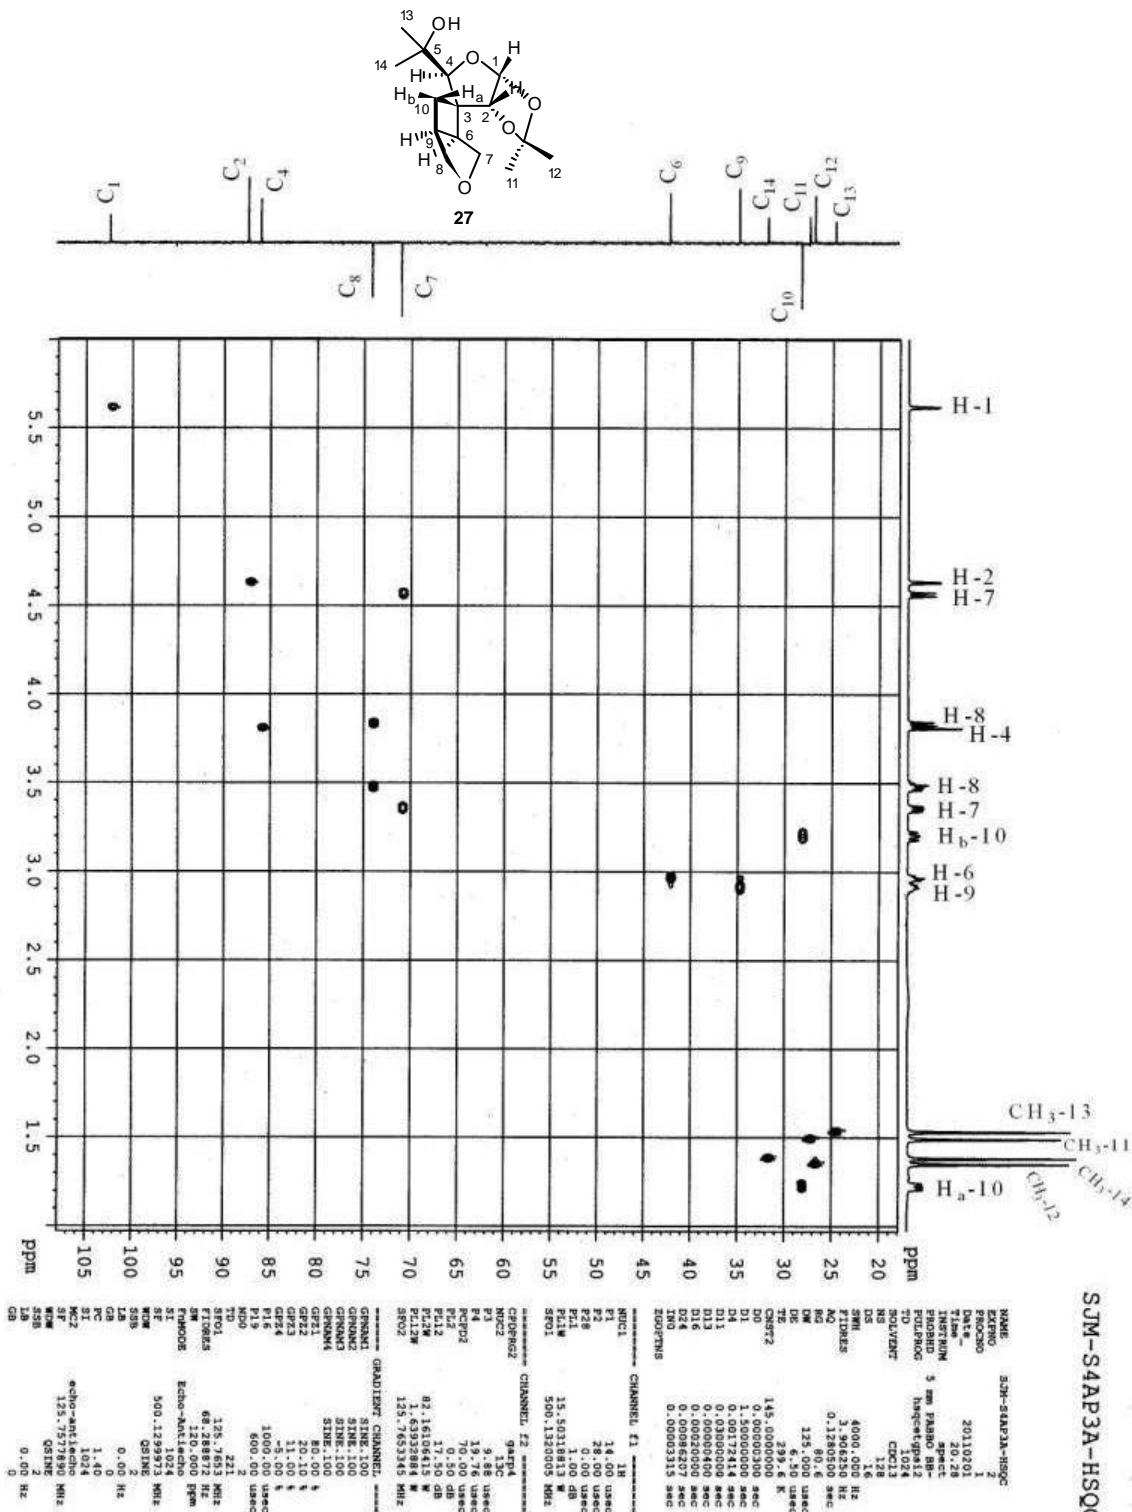

# NOESY of **27** in CDCl<sub>3</sub>

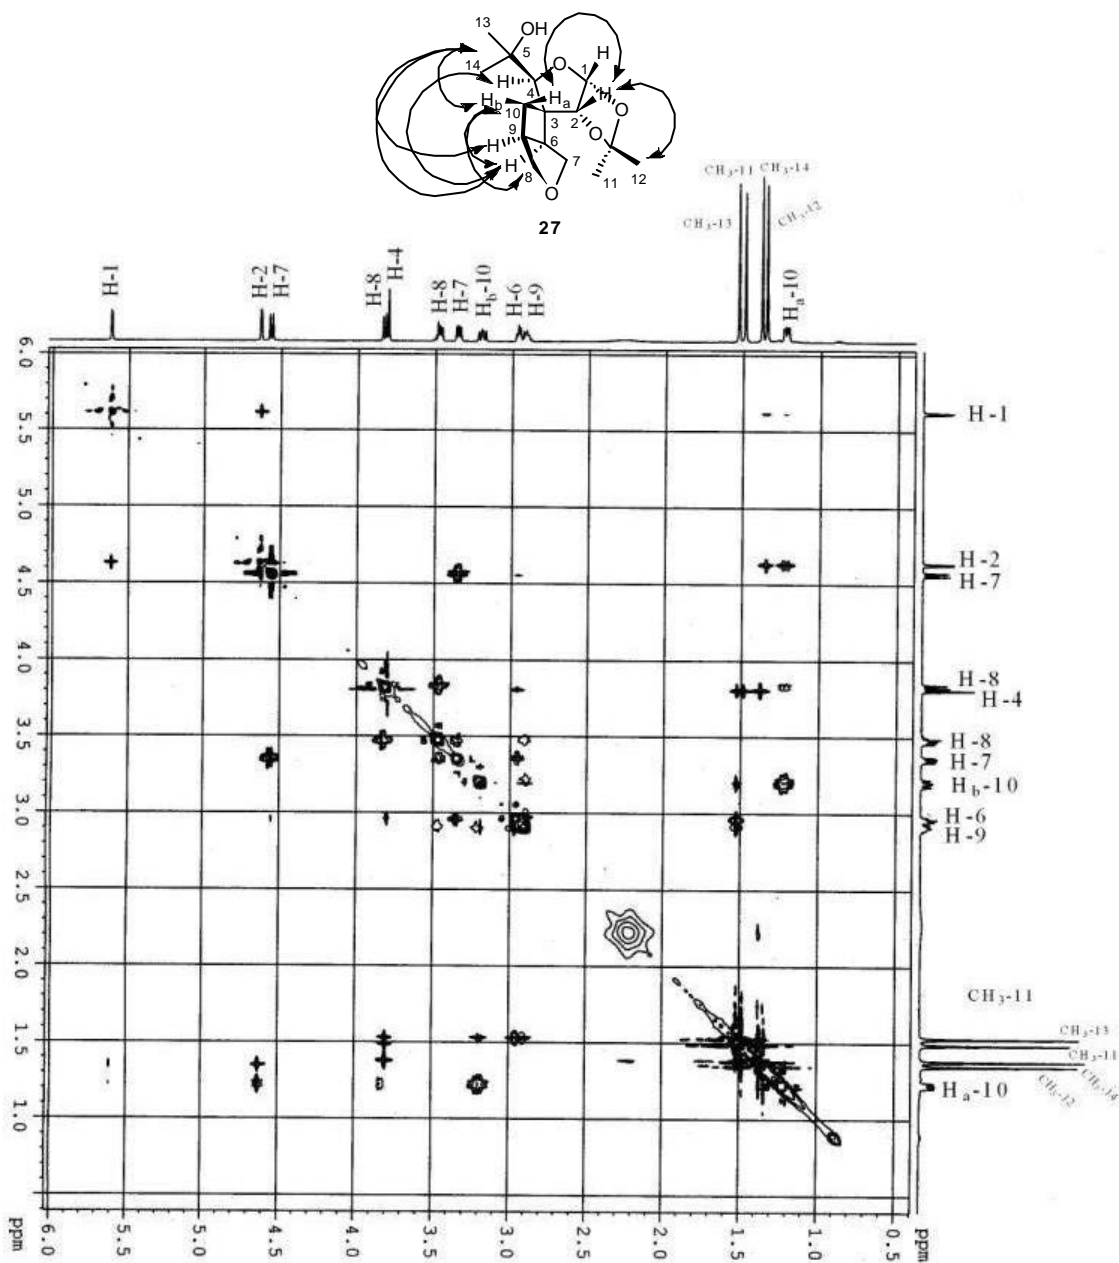

## SJM-S4AP3A-noesy(SR)

|         |                  |
|---------|------------------|
| NAME    | SJM-S4AP3A-noesy |
| EXPNO   | 2                |
| PROCNO  | 1                |
| Date_   | 20110202         |
| Time    | 19.45            |
| INSTRUM | 5 mm PABRO BB-   |
| PROBHD  | spect            |
| PULPROG | noesyph          |
| TD      | 2048             |
| SOLVENT | CDCl3            |
| DS      | 80               |
| NS      | 16               |
| SMH     | 4000.000 Hz      |
| FIDRES  | 1.953125 Hz      |
| AQ      | 0.2560500 sec    |
| RG      | 80.6             |
| DW      | 125.000 usec     |
| DE      | 6.50 usec        |
| TE      | 299.7 K          |
| DO      | 0.00010717 sec   |
| D1      | 2.00000000 sec   |
| D8      | 0.44999999 sec   |
| INO     | 0.00025000 sec   |

  

|            |                 |
|------------|-----------------|
| CHANNEL f1 |                 |
| NUC1       | 1H              |
| P1         | 14.00 usec      |
| PL1        | 1.00 dB         |
| PL1W       | 15.5031813 W    |
| SFO1       | 500.1320005 MHz |
| ND0        | 1               |
| TD         | 227             |
| SFO1       | 500.132 MHz     |
| FIDRES     | 17.621162 Hz    |
| SW         | 7.998 ppm       |
| FMODE      | States-tppl     |
| SI         | 1024            |
| SF         | 500.1300000 MHz |
| WDW        | OSINE           |
| SSB        | 2               |
| LB         | 0.00 Hz         |
| GB         | 0               |
| PC         | 0.80            |
| SI         | 1024            |
| MC2        | States-tppl     |
| SF         | 500.1300000 MHz |
| WDW        | OSINE           |
| SSB        | 2               |
| LB         | 0.00 Hz         |
| GB         | 0               |

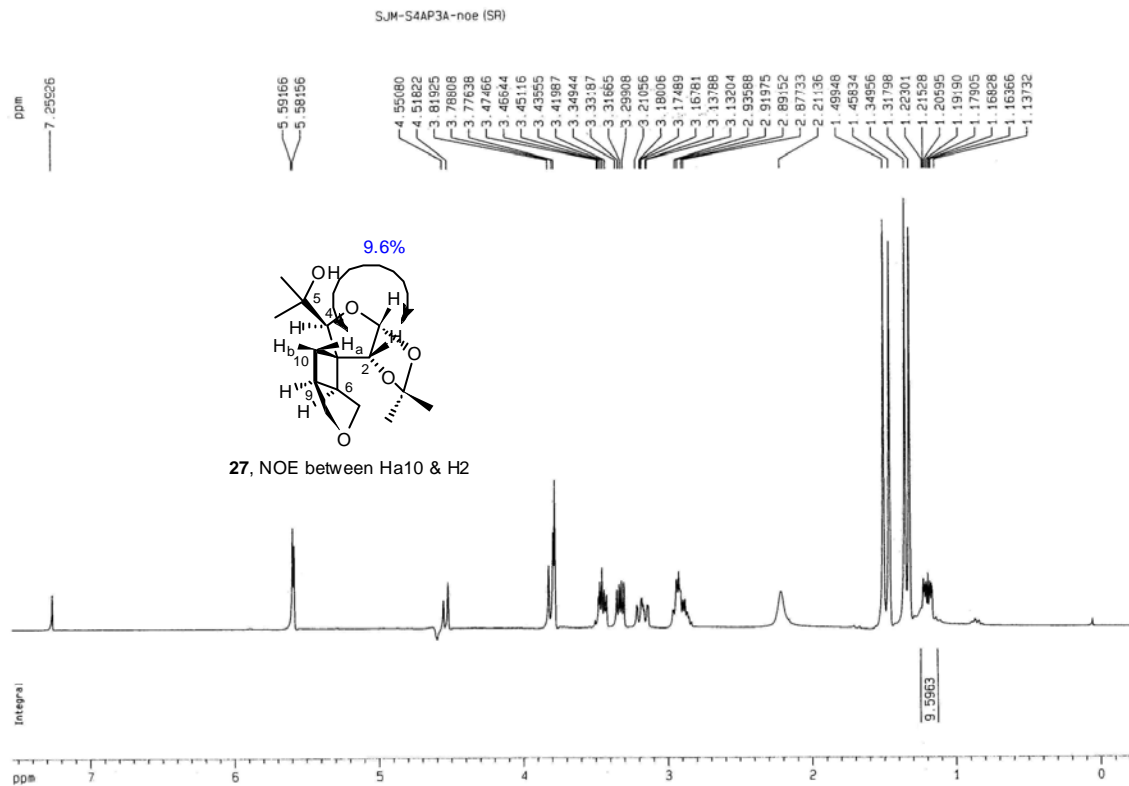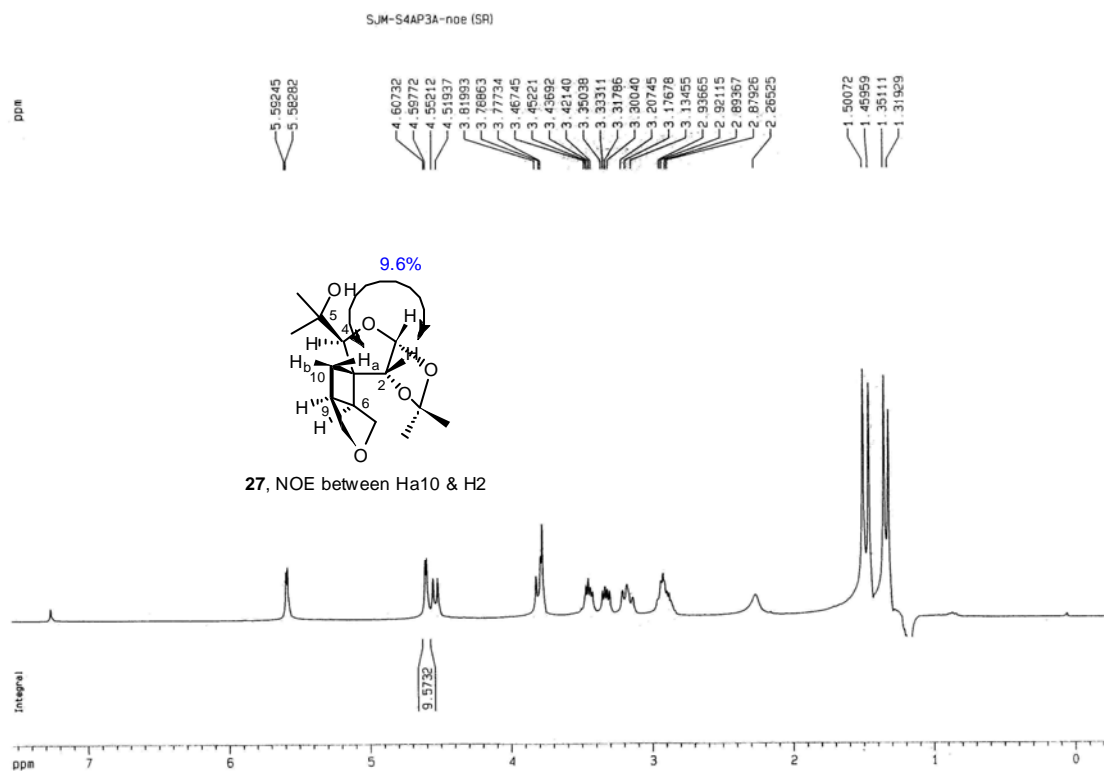

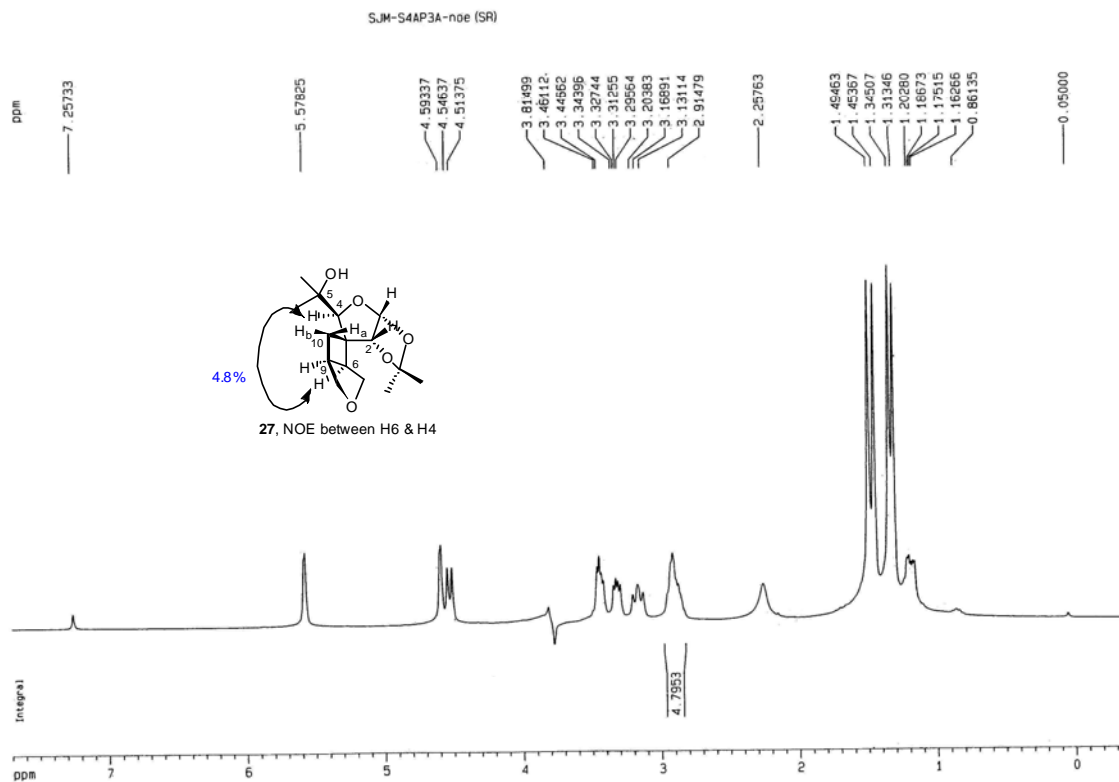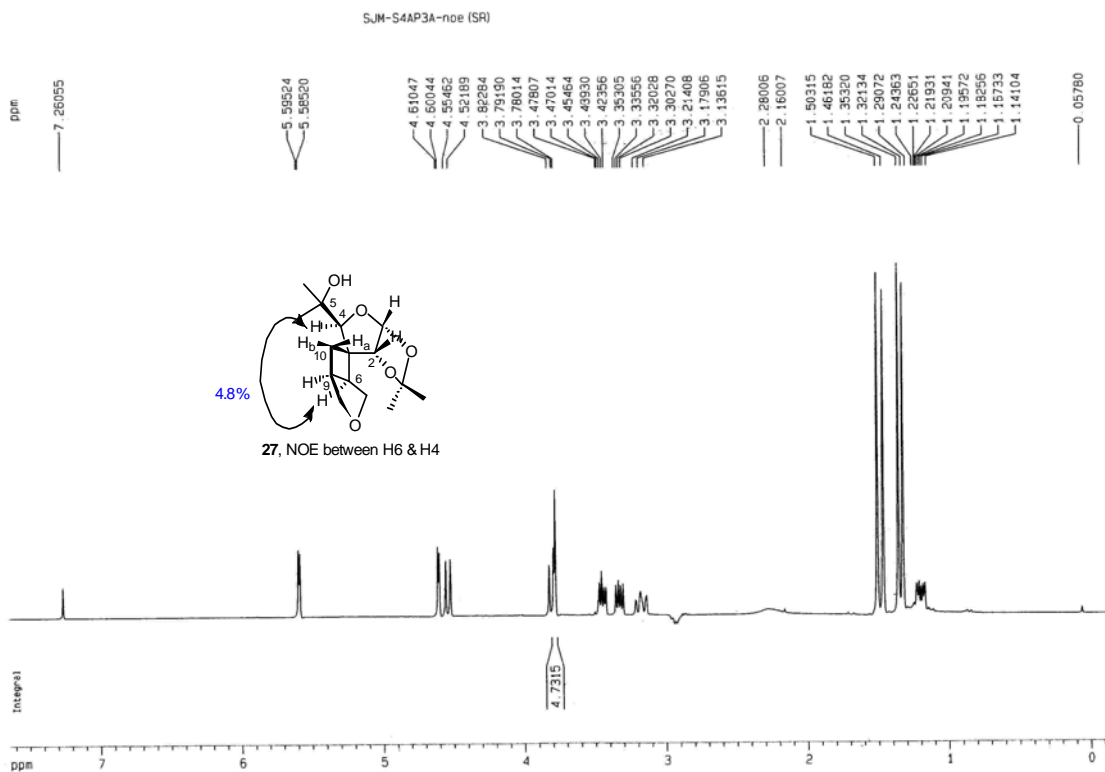

$^1\text{H}$  NMR of **28** in  $\text{CDCl}_3$  (300 MHz)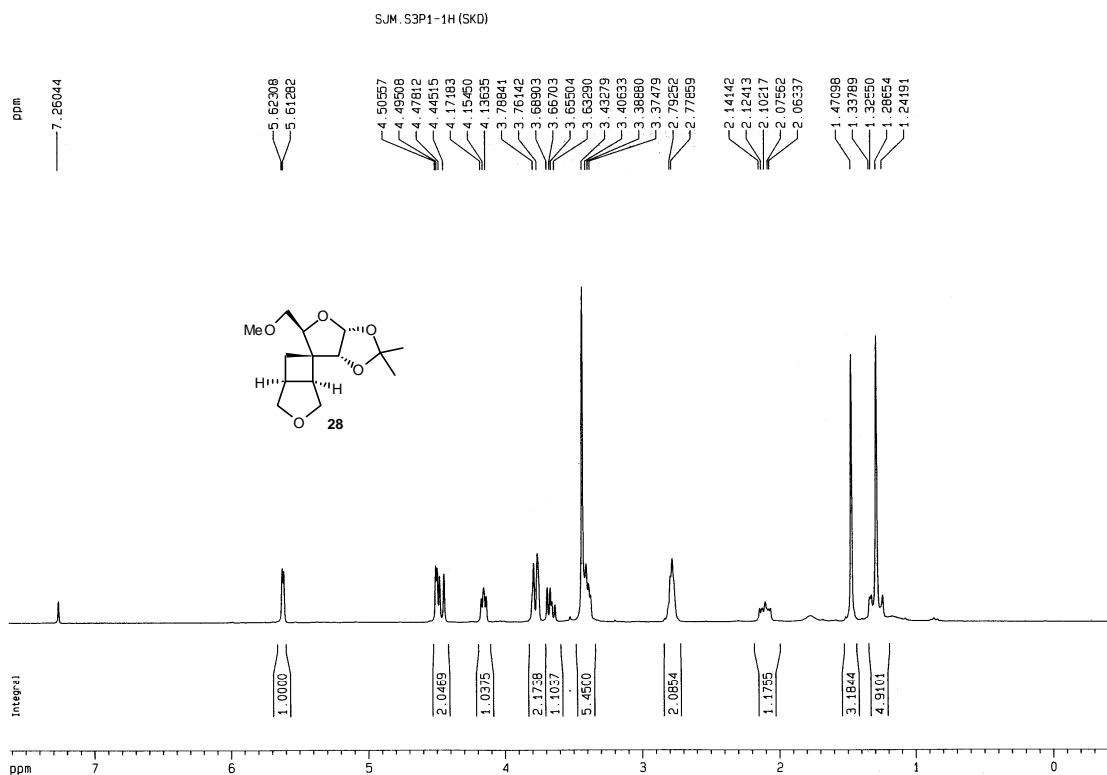 $^{13}\text{C}$  NMR of **28** in  $\text{CDCl}_3$  (75 MHz)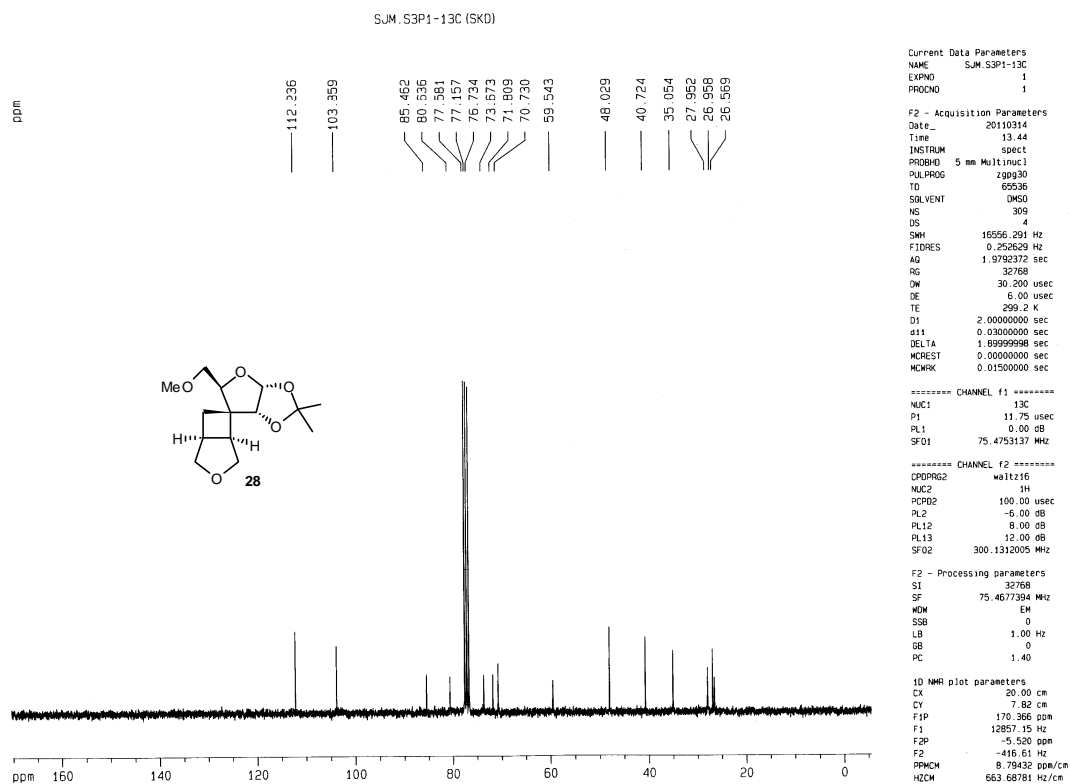

# <sup>1</sup>H NMR of **29** in CDCl<sub>3</sub> (500 MHz)

SJM-S3145-1H (SR)

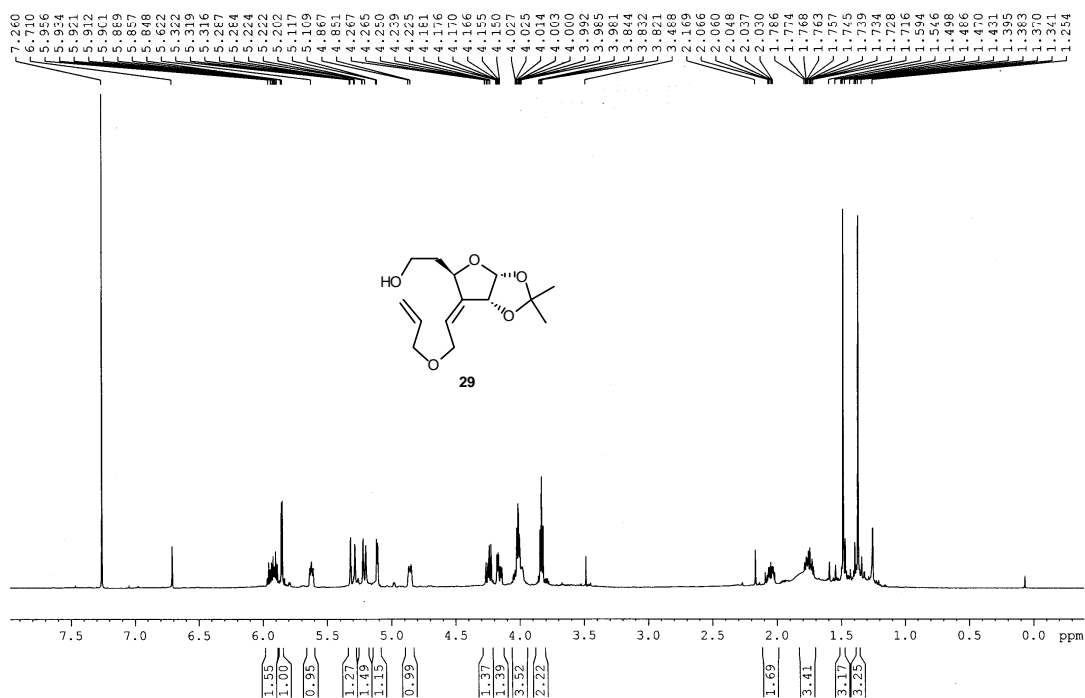

# <sup>13</sup>C NMR of **29** in CDCl<sub>3</sub> (125 MHz)

SJM-S3145-13C (SR)

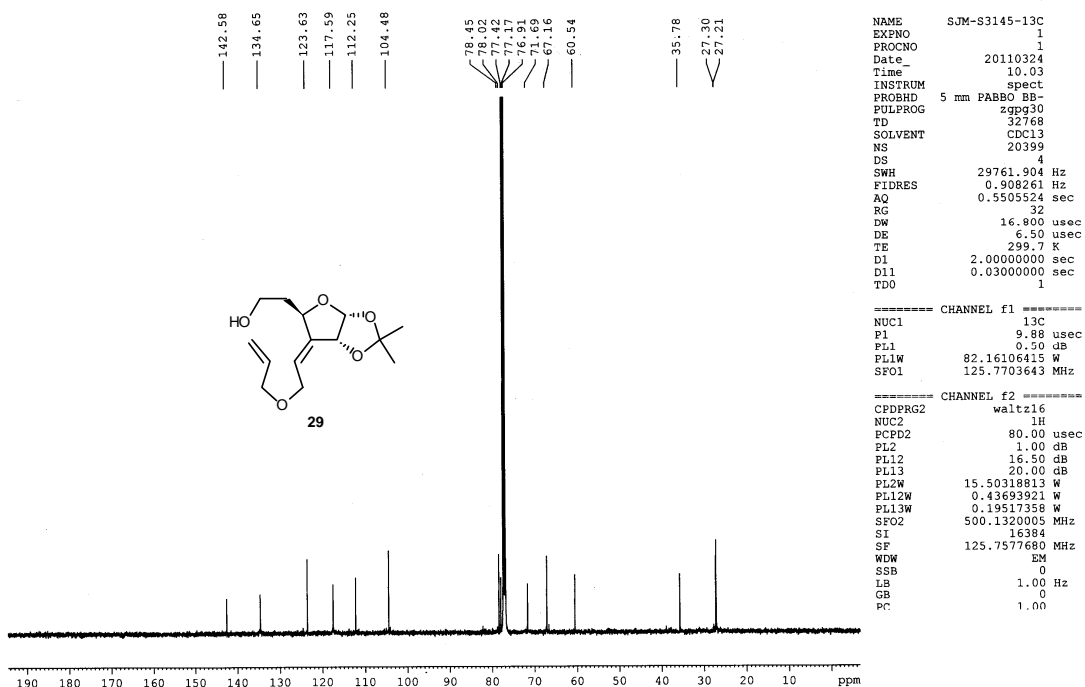



# <sup>1</sup>H NMR of **30** in CDCl<sub>3</sub> (500 MHz)

SJM-S3146-1H (SR)

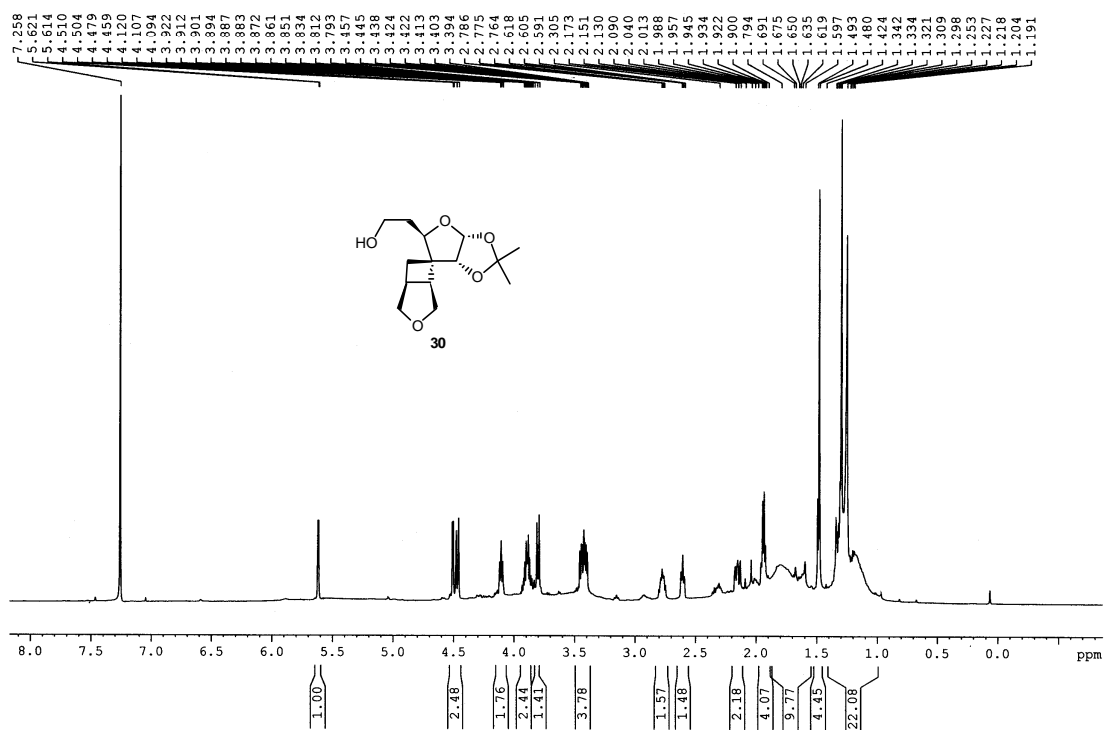

# <sup>13</sup>C NMR of **30** in CDCl<sub>3</sub> (125 MHz)

SJM-S3146-13C (SR)

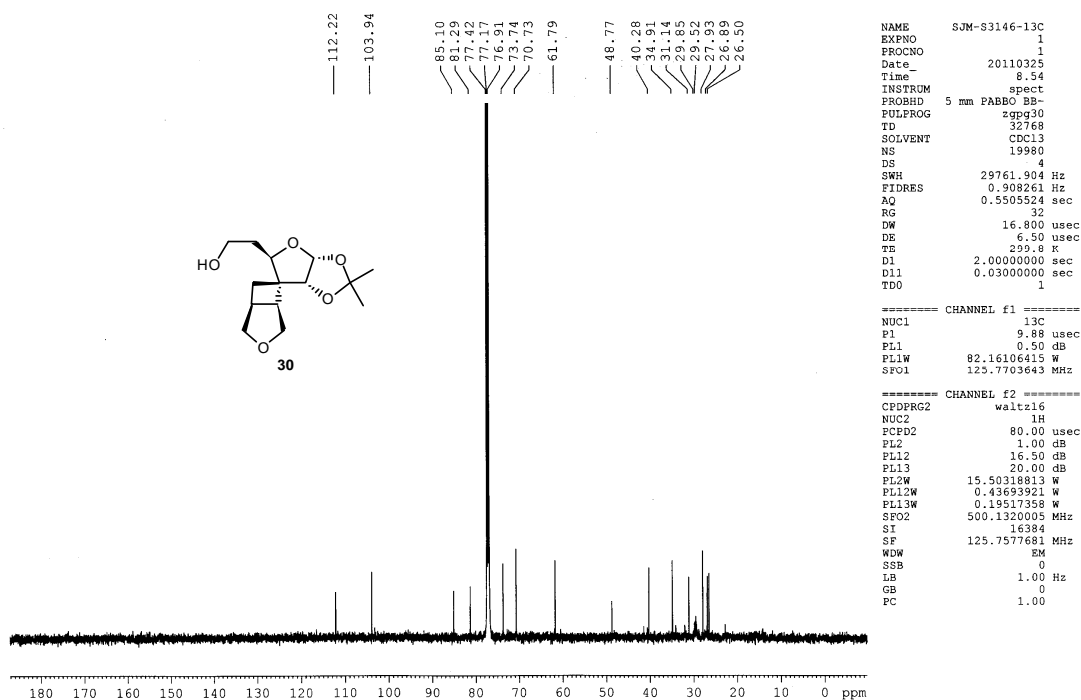

<sup>1</sup>H NMR of **31** in CDCl<sub>3</sub> (300 MHz)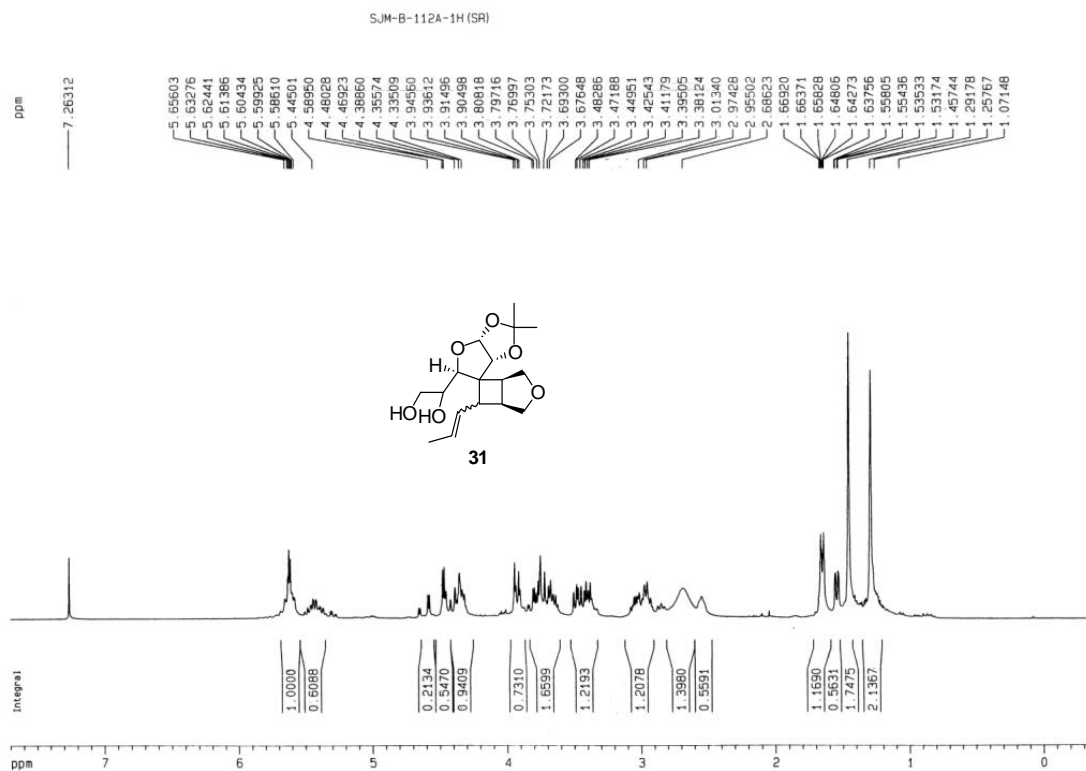 $^{13}\text{C}$  NMR of **31** in  $\text{CDCl}_3$  (75 MHz)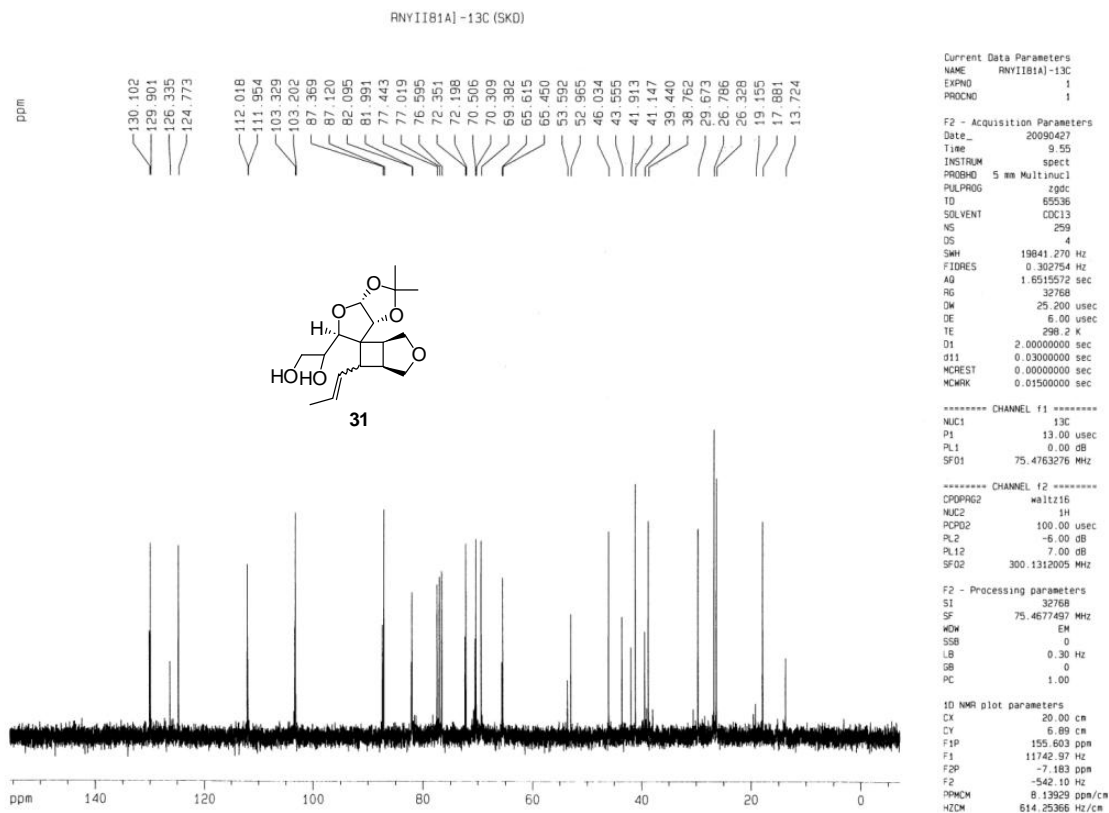

# <sup>1</sup>H NMR of **32** in CDCl<sub>3</sub> (300 MHz)

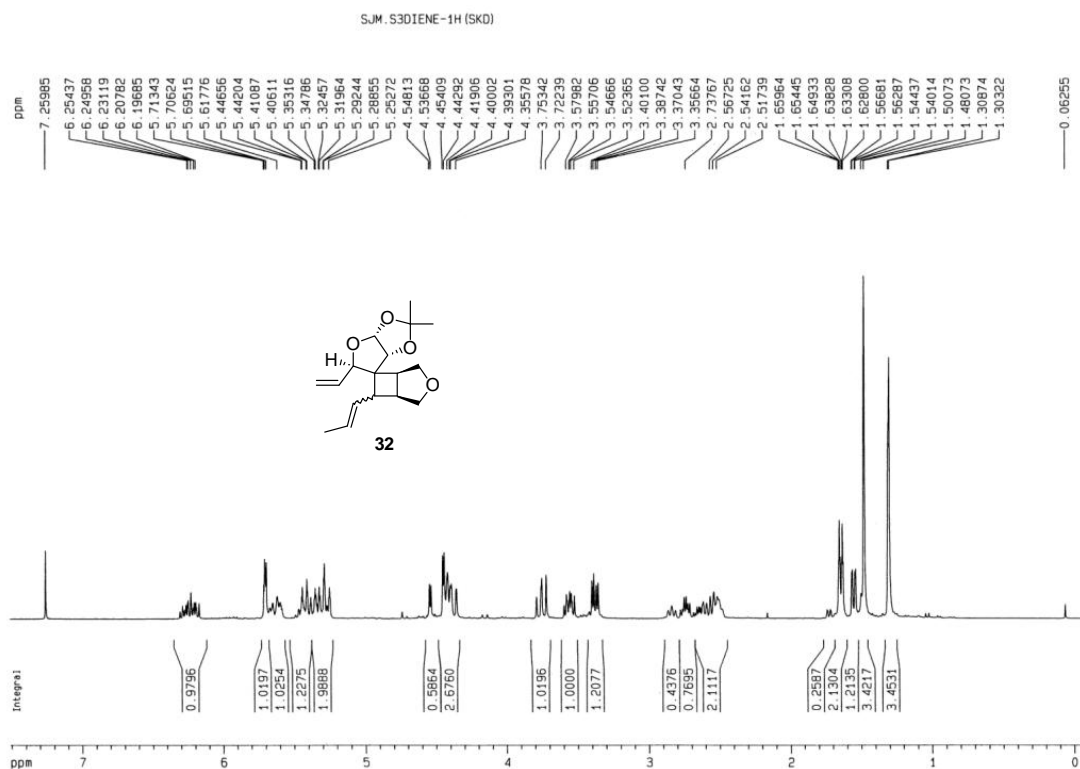

# <sup>13</sup>C NMR of **32** in CDCl<sub>3</sub> (75 MHz)

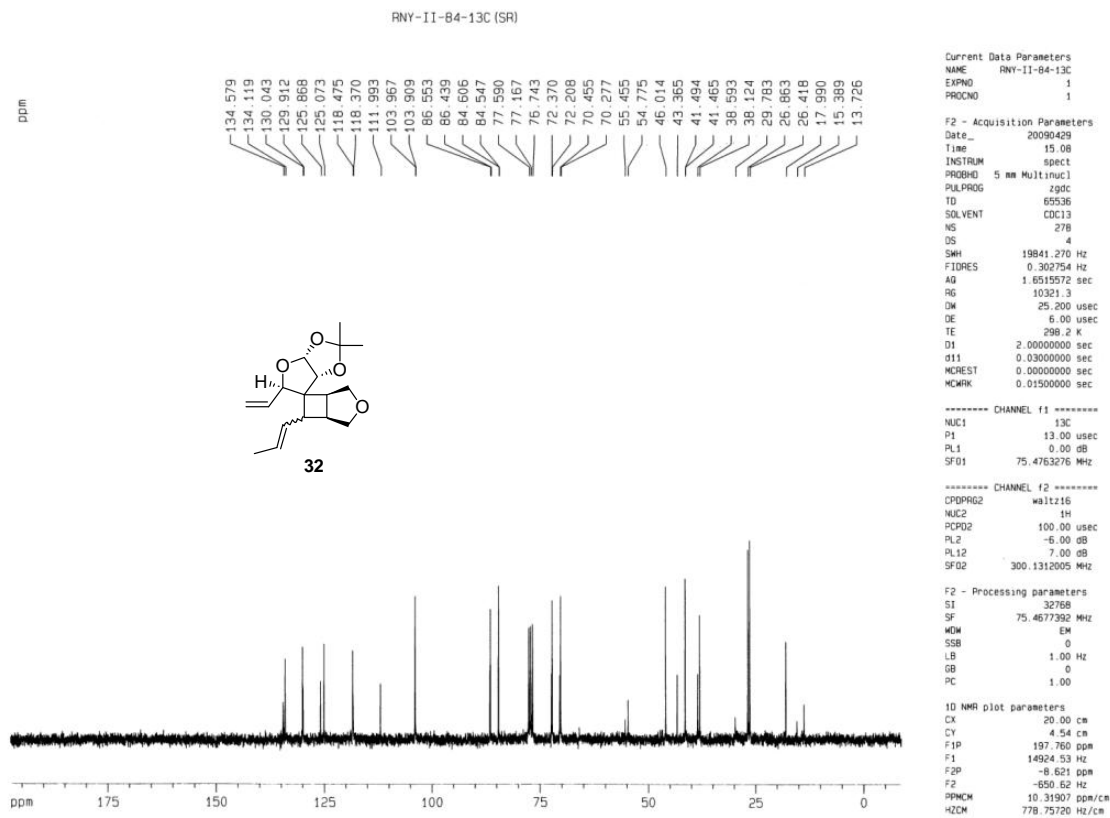

# <sup>1</sup>H NMR of **33** in CDCl<sub>3</sub> (300 MHz)

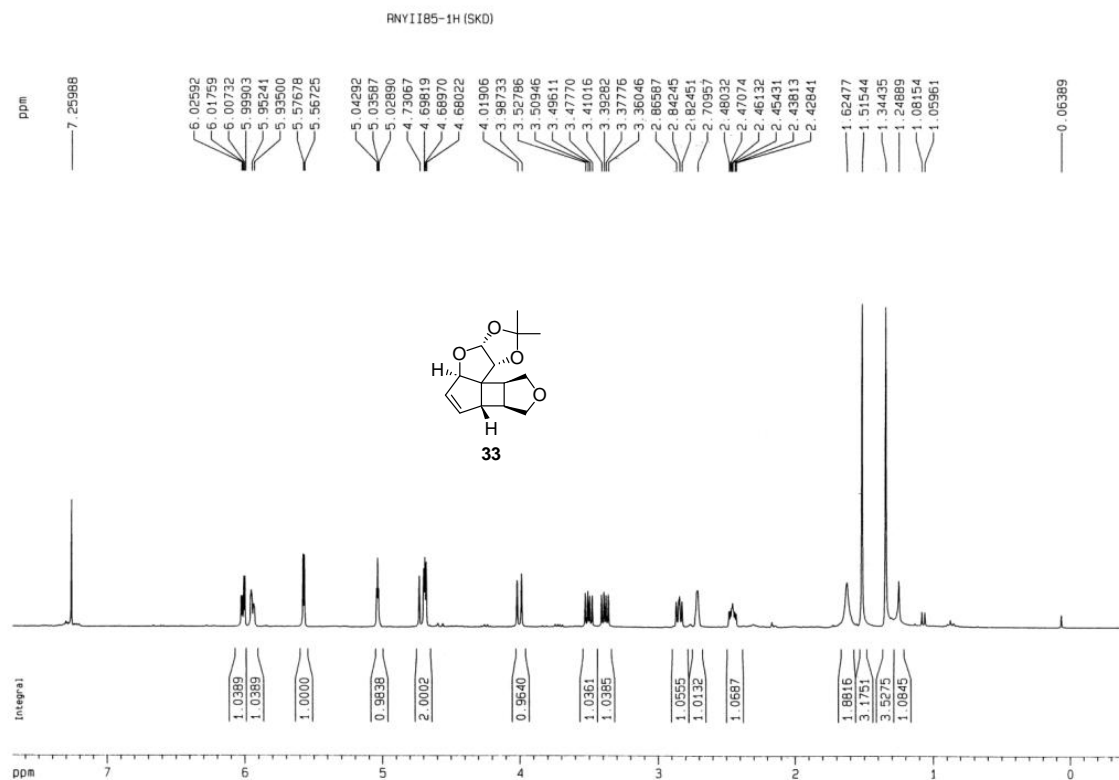

# <sup>1</sup>H NMR of **34** in CDCl<sub>3</sub> (300 MHz)

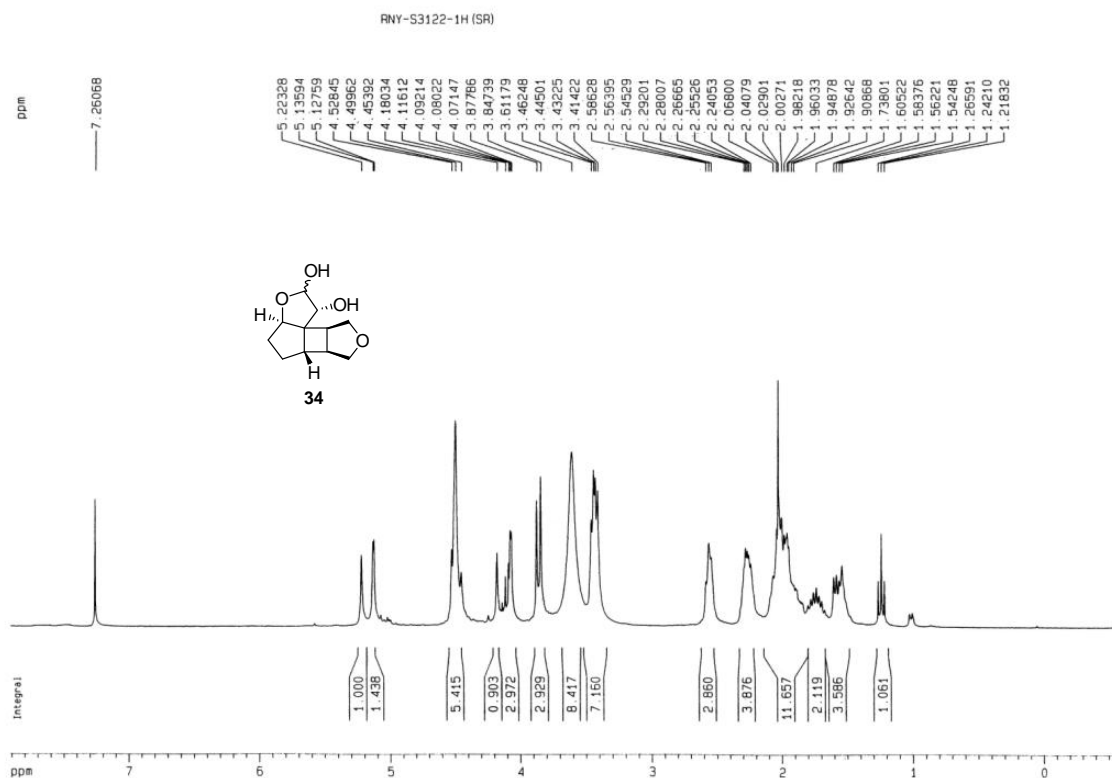

## <sup>13</sup>C NMR of **34** in CDCl<sub>3</sub> (75 MHz)

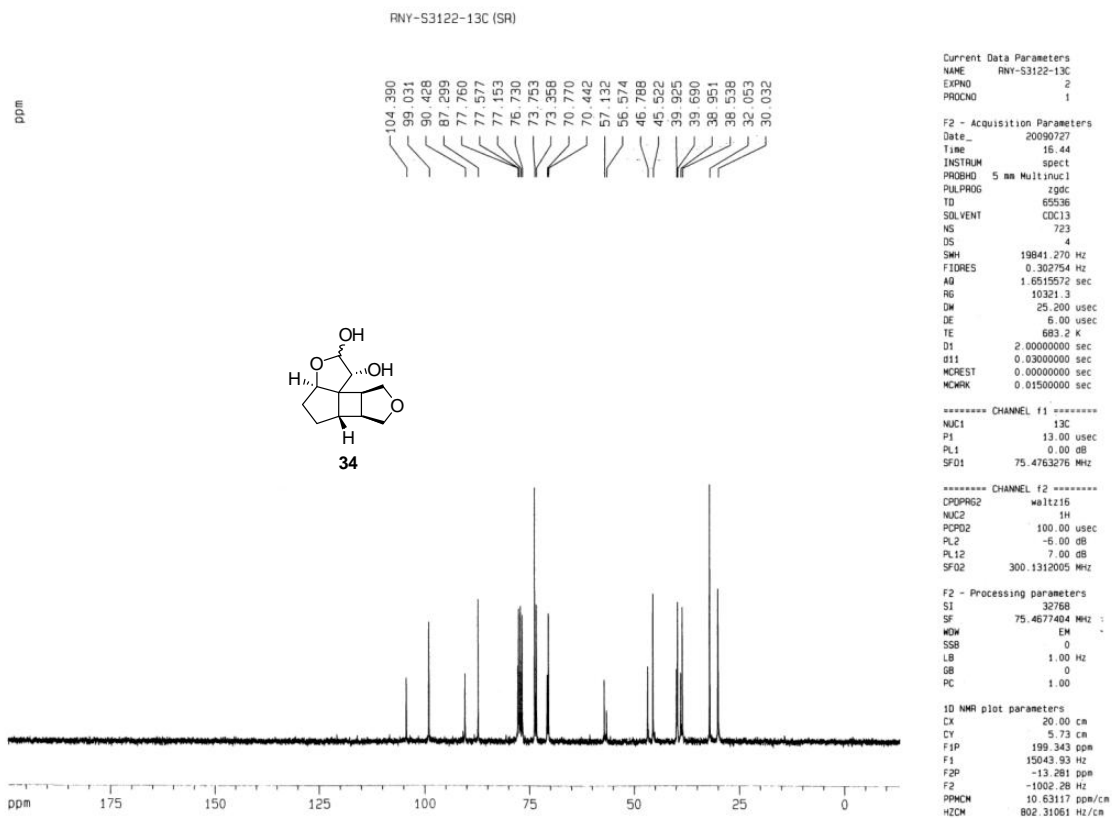

$^1\text{H}$  NMR of **35** in  $\text{CDCl}_3$  (500 MHz)

SJM-S3136-1H (SR)

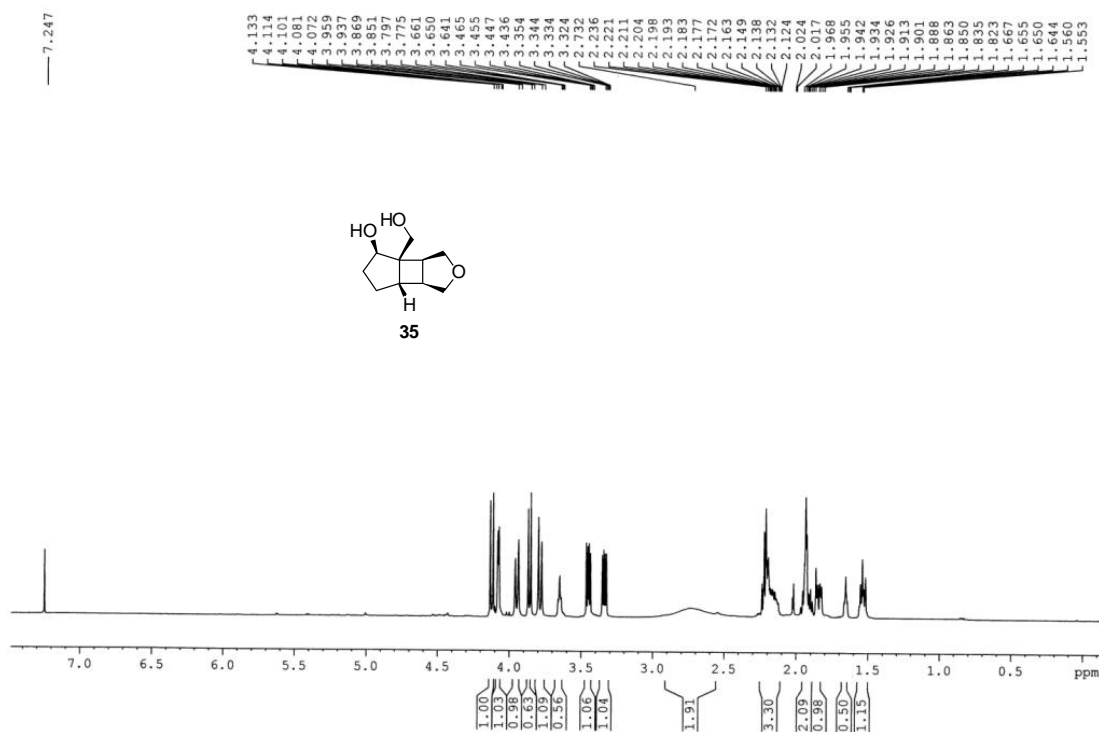

$^{13}\text{C}$  NMR of **35** in  $\text{CDCl}_3$  (125 MHz)

SJM-S3136-13C (SR)

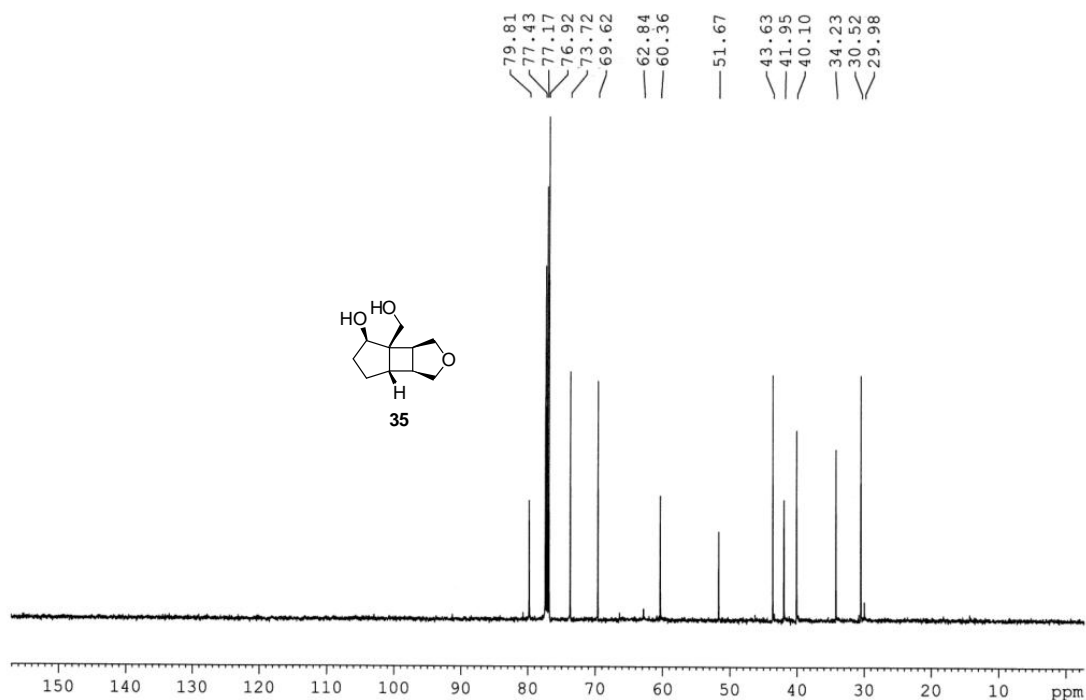







<sup>1</sup>H NMR of **38** in CDCl<sub>3</sub> (500 MHz)

SJM-S425A-1H (SR)

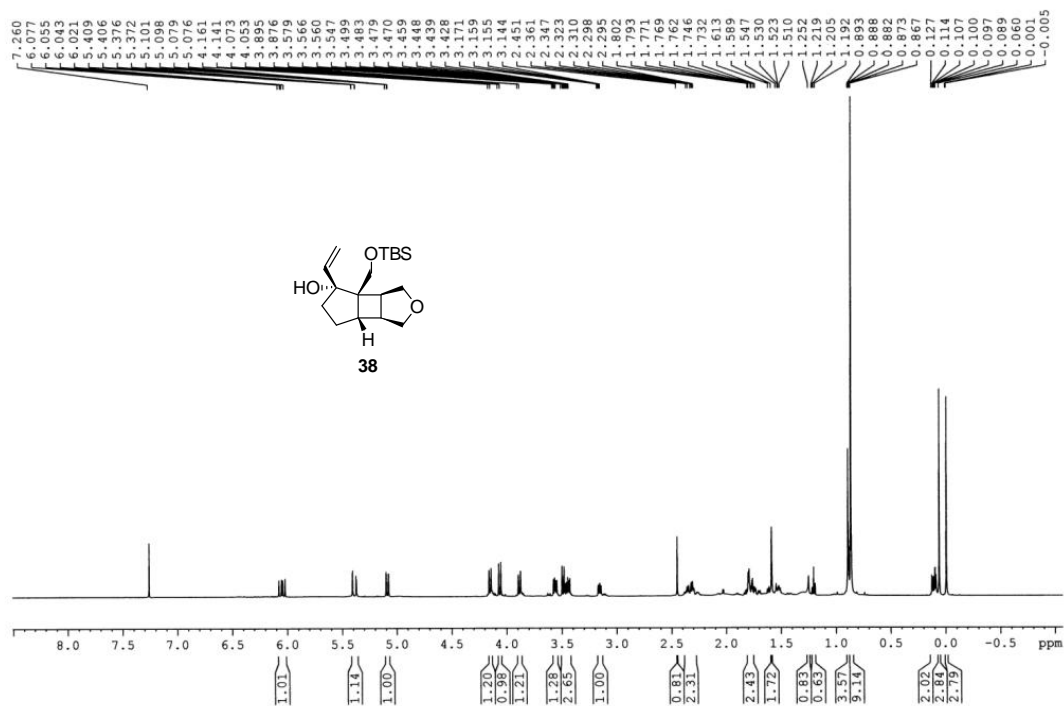

<sup>13</sup>C NMR of **38** in CDCl<sub>3</sub> (125 MHz)

SJM-S425A-13C (SR)

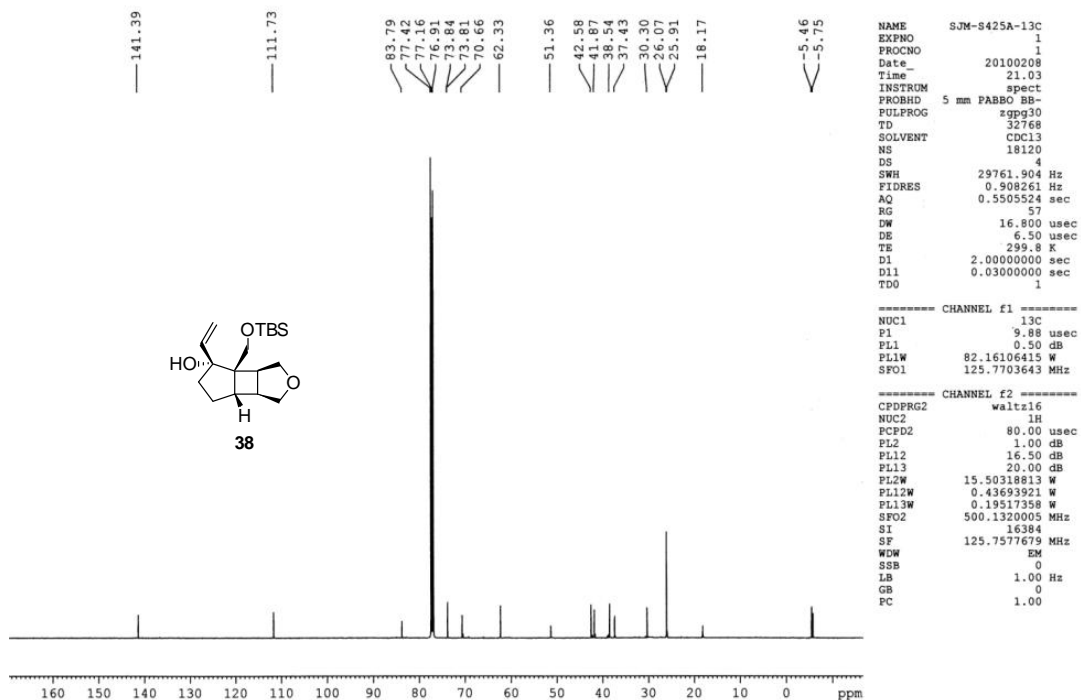

# <sup>1</sup>H NMR of **39** in CDCl<sub>3</sub> (500 MHz)

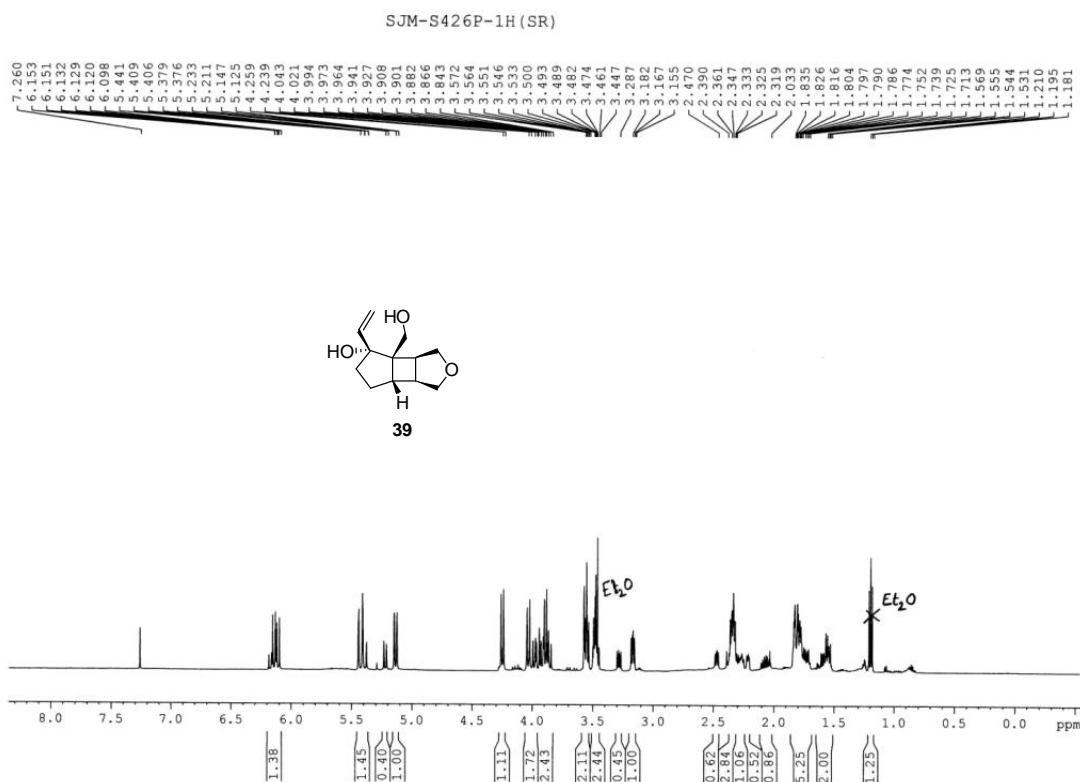

# <sup>13</sup>C NMR of **39** in CDCl<sub>3</sub> (125 MHz)

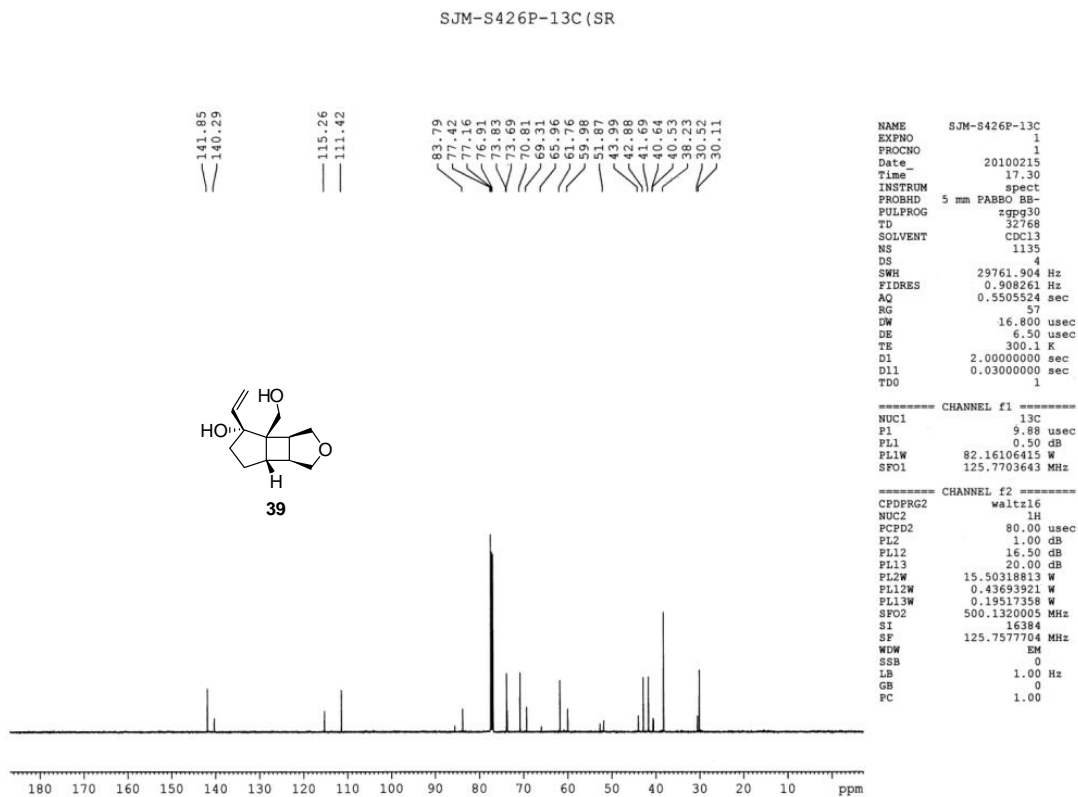

# <sup>1</sup>H NMR of **40** in CDCl<sub>3</sub> (500 MHz)

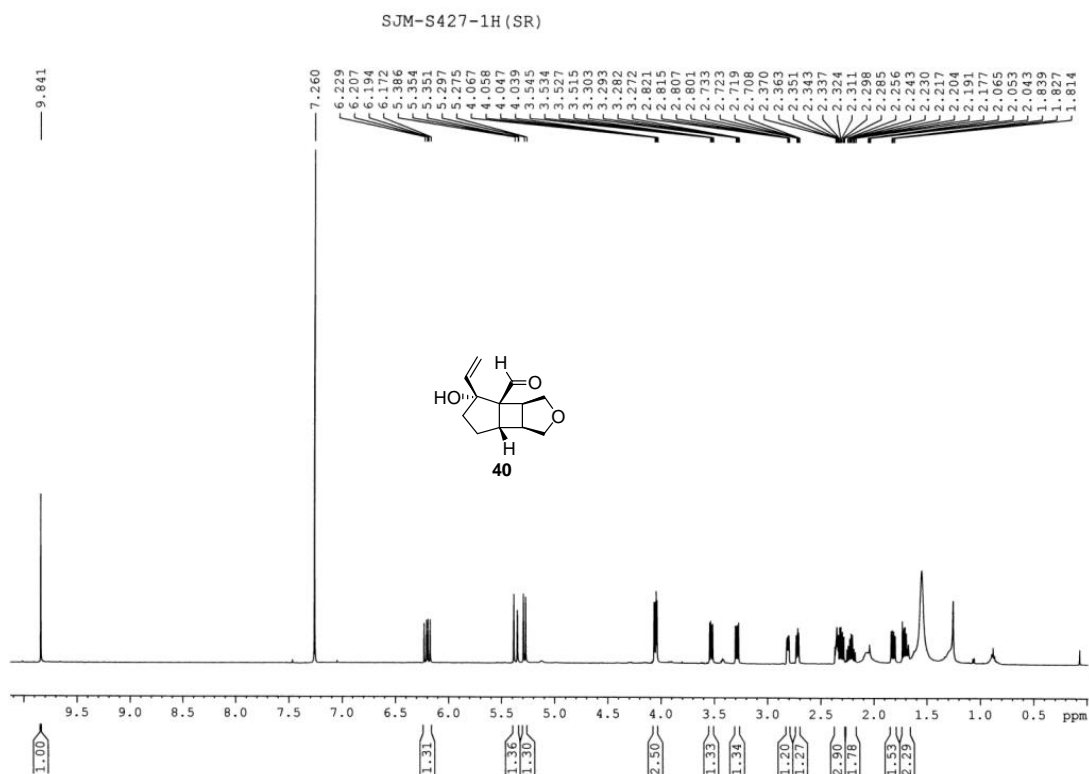

# <sup>13</sup>C NMR of **40** in CDCl<sub>3</sub> (125 MHz)

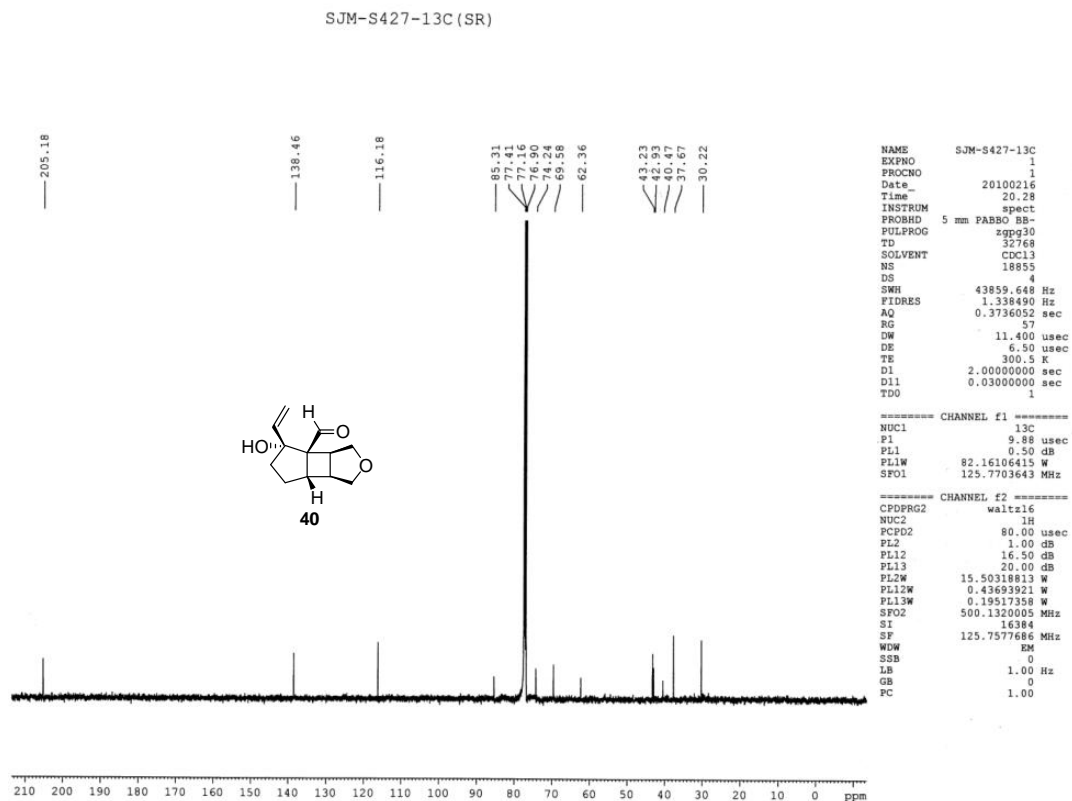

# <sup>1</sup>H NMR of **41** in CDCl<sub>3</sub> (300 MHz)

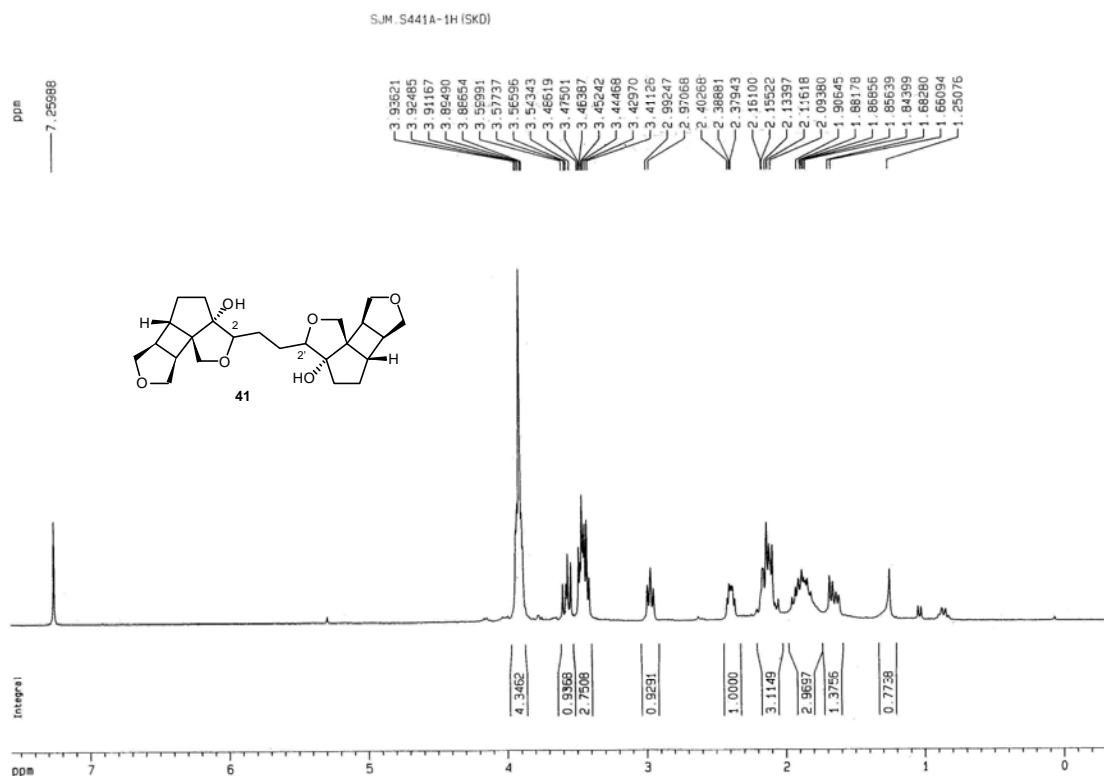

# <sup>13</sup>C NMR of **41** in CDCl<sub>3</sub> (75 MHz)

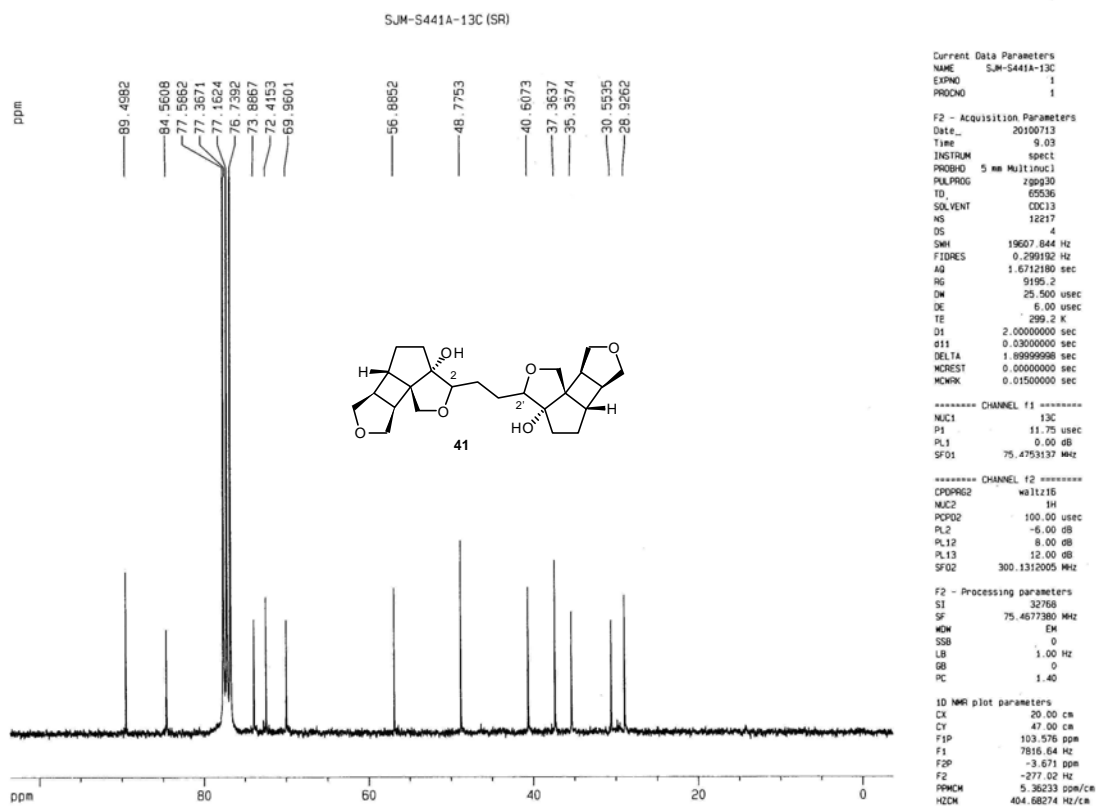

# DEPT-135 of **41** in CDCl<sub>3</sub> (75 MHz)

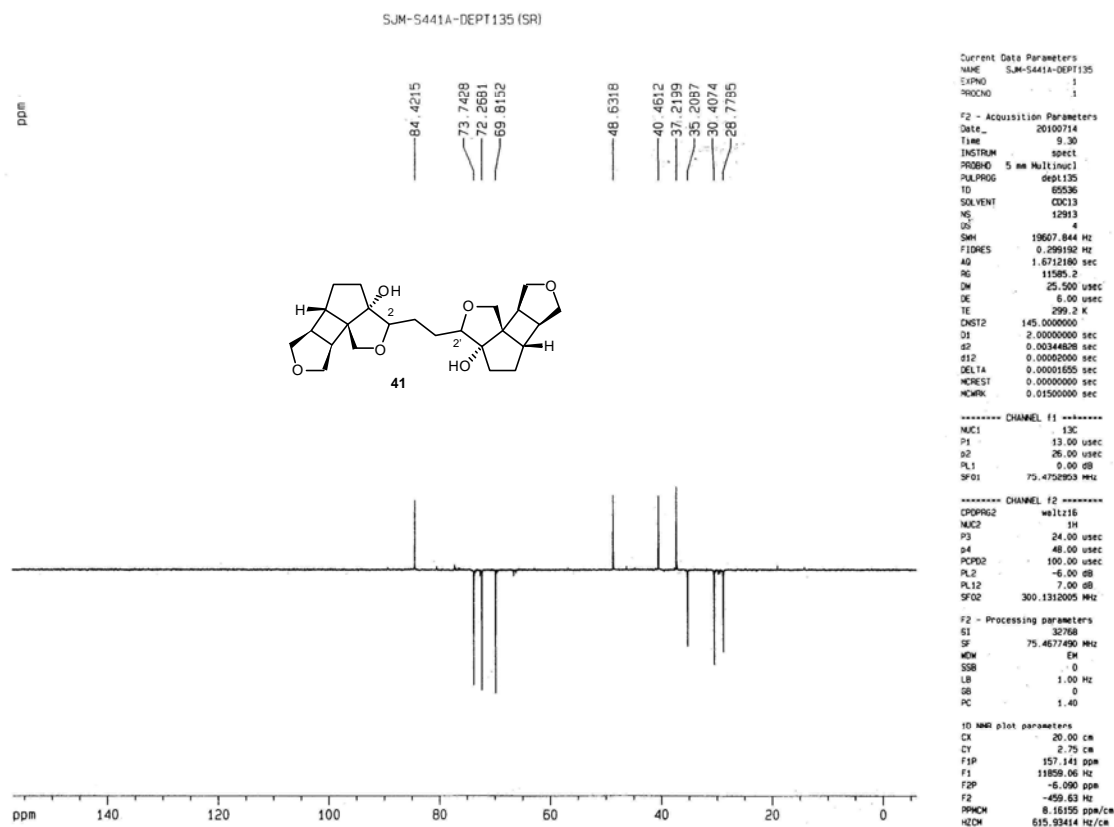

Supplement: c1ob05233k_2.pdf [file c1ob05233k_2.pdf]
